# Supplementary material for: Multi-Component Syntheses of Spiro[furan-2,3′-indoline]-3-carboxylate Derivatives Using Ionic Liquid Catalysts
Source: MDPI journal article supplement (doi:10.3390/molecules29061223), 2024-03-08
Supplement: s1 [file s1]

## Supplementary Materials

### Multi-Component Syntheses of Spiro[furan-2,3'-indoline]-3-carboxylate Derivatives Using Ionic Liquid Catalysts

Mehdi Khalaj <sup>1,\*</sup>, Maryam Zarandi <sup>1</sup>, Malihe Samadi Kazemi <sup>2</sup>, Seyed Mahmoud Musavi <sup>1</sup>,  
Johannes Hohnsen <sup>3</sup>, and Axel Klein <sup>3,\*</sup>

<sup>1</sup> Department of Chemistry, Buinzahra Branch, Islamic Azad University, Buinzahra 1477893855, Iran

<sup>2</sup> Department of Chemistry, Faculty of Science, Bojnourd Branch, Islamic Azad University,  
Bojnourd 9417697796, Iran

<sup>3</sup> Faculty of Mathematics and Natural Sciences, Department of Chemistry and Biochemistry,  
Institute for Inorganic Chemistry, University of Cologne, Greinstrasse 6, D-50939 Köln, Germany

\* Correspondence: khalaj\_mehdi@yahoo.com (M.K.); axel.klein@uni-koeln.de (A.K.)

#### Contents:

#### 1. Materials and Methods

##### 1.1 Preparation of the ionic liquid catalyst **Cat1**

**Scheme S1.** Preparation of the ionic liquid catalyst **Cat1**

##### 1.2 Preparation of the ionic liquid catalyst **Cat2**

**Scheme S2.** Preparation of the ionic liquid catalyst **Cat2**

##### 1.3 Synthesis of ethyl 1'-R<sub>2</sub>-2',5-dioxo-4-(R<sub>1</sub>-amino)-5H-spiro[5-R<sub>3</sub>-furan-2,3'-indoline]-3-carboxylates

**Scheme S3.** Synthesis of ethyl 1'-R<sub>2</sub>-2',5-dioxo-4-(R<sub>1</sub>-amino)-5H-spiro[5-R<sub>3</sub>-furan-2,3'-indoline]-3-carboxylates

#### 2. Supplementary Figures

**Figure S1.** <sup>1</sup>H NMR spectrum of **1a** in DMSO-d<sub>6</sub>

**Figure S2.** <sup>13</sup>C NMR spectrum of **1a** in DMSO-d<sub>6</sub>

**Figure S3.** <sup>1</sup>H NMR spectrum of **2a** in DMSO-d<sub>6</sub>

**Figure S4.** <sup>13</sup>C NMR spectrum of **2a** in DMSO-d<sub>6</sub>

**Figure S5.** <sup>1</sup>H NMR spectrum of **3a** in DMSO-d<sub>6</sub>

**Figure S6.** <sup>13</sup>C NMR spectrum of **3a** in DMSO-d<sub>6</sub>

**Figure S7.** <sup>1</sup>H NMR spectrum of **4a** in DMSO-d<sub>6</sub> in DMSO-d<sub>6</sub>

**Figure S8.** <sup>13</sup>C NMR spectrum of **4a** in DMSO-d<sub>6</sub>

**Figure S9.** <sup>1</sup>H NMR spectrum of **5a** in DMSO-d<sub>6</sub>

**Figure S10.** <sup>13</sup>C NMR spectrum of **5a** in DMSO-d<sub>6</sub>

**Figure S11.** <sup>1</sup>H NMR spectrum of **6a** in DMSO-d<sub>6</sub>

**Figure S12.** <sup>13</sup>C NMR spectrum of **6a** in DMSO-d<sub>6</sub>

**Figure S13.**  $^1\text{H}$  NMR spectrum of **7a** in  $\text{DMSO-d}_6$

**Figure S14.**  $^{13}\text{C}$  NMR spectrum of **7a** in  $\text{DMSO-d}_6$

**Figure S15.**  $^1\text{H}$  NMR spectrum of **8a** in  $\text{DMSO-d}_6$

**Figure S16.**  $^{13}\text{C}$  NMR spectrum of **8a** in  $\text{DMSO-d}_6$

**Figure S17.**  $^1\text{H}$  NMR spectrum of **9a** in  $\text{DMSO-d}_6$

**Figure S18.**  $^{13}\text{C}$  NMR spectrum of **9a** in  $\text{DMSO-d}_6$

**Figure S19.**  $^1\text{H}$  NMR spectrum of **10a** in  $\text{DMSO-d}_6$

**Figure S20.**  $^{13}\text{C}$  NMR spectrum of **10a** in  $\text{DMSO-d}_6$

**Figure S21.**  $^1\text{H}$  NMR spectrum of **11a** in  $\text{DMSO-d}_6$

**Figure S22.**  $^{13}\text{C}$  NMR spectrum of **11a** in  $\text{DMSO-d}_6$

**Figure S23.**  $^1\text{H}$  NMR spectrum of **12a** in  $\text{DMSO-d}_6$

**Figure S24.**  $^{13}\text{C}$  NMR spectrum of **12a** in  $\text{DMSO-d}_6$

**Figure S25.**  $^1\text{H}$  NMR spectrum of **13a** in  $\text{DMSO-d}_6$

**Figure S26.**  $^{13}\text{C}$  NMR spectrum of **13a** in  $\text{DMSO-d}_6$

**Figure S27.**  $^1\text{H}$  NMR spectrum of **14a** in  $\text{DMSO-d}_6$

**Figure S28.**  $^{13}\text{C}$  NMR spectrum of **14a** in  $\text{DMSO-d}_6$

**Figure S29.**  $^1\text{H}$  NMR spectrum of **15a** in  $\text{DMSO-d}_6$

**Figure S30.**  $^{13}\text{C}$  NMR spectrum of **15a** in  $\text{DMSO-d}_6$

**Figure S31.** Photograph of the TLC control of the reaction of aniline, diethyl acetylenedicarboxylate, 1-ethylindoline-2-,3-dione, using HOAc as catalyst.

**Figure S32.**  $^1\text{H}$  NMR spectrum of the product mixture from the reaction of aniline, diethyl acetylenedicarboxylate, 1-ethylindoline-2-,3-dione, using HOAc as catalyst, measured in  $\text{DMSO-d}_6$ .

**Figure S33.** Photograph of the TLC control of the reaction of aniline, diethyl acetylenedicarboxylate, 1-ethylindoline-2-,3-dione, using  $\text{H}_2\text{SO}_4$  as catalyst.

**Figure S34.**  $^1\text{H}$  NMR spectrum of the product mixture from the reaction of aniline, diethyl acetylenedicarboxylate, 1-ethylindoline-2-,3-dione, using HOAc as catalyst, measured in  $\text{DMSO-d}_6$ .

## 1. Materials and Methods

### 1.1 Preparation of the ionic liquid catalyst **Cat1**

8.211 g (10 mmol) *N*-methyl imidazole was mixed with 7.75 g (5 mmol) 1,6-dichlorohexane in 100 mL toluene and the mixture was heated under reflux overnight. The solvent was evaporated under vacuum. The thus obtained sample **(A1)** (3.18 g, 10 mmol, 99% yield) was dissolved in 100 mL MeOH, 1.96 g (20 mmol) sulfuric acid was added and the mixture stirred for 3 h. The reaction mixture was evaporated to dryness removing solvent and HCl from the mixture. The product was dried in vacuo (Scheme S1). Yield: 4.38 g (9.9 mmol, 99%) off-white powder.  $C_{14}H_{26}N_4O_8S_2$  (442.50 g/mol). Elemental analysis calc. (found): C 38.00 (38.01), H 5.92 (5.89), 12.66 (12.67) %.  $^1H$  NMR (300 MHz, DMSO- $d_6$ )  $\delta$  = 9.18 (s, 2H), 7.78 (m, 2H,  $J$  = 1.6 Hz), 7.72 (m, 2H), 4.15 (m, 4H,  $J$  = 7.2 Hz), 3.86 (s, 6H), 1.85–1.72 (m, 4H), 1.33–1.17 (m, 4H) ppm. No signals of residual 1,6-dichlorohexane or *N*-methyl imidazole were observed.

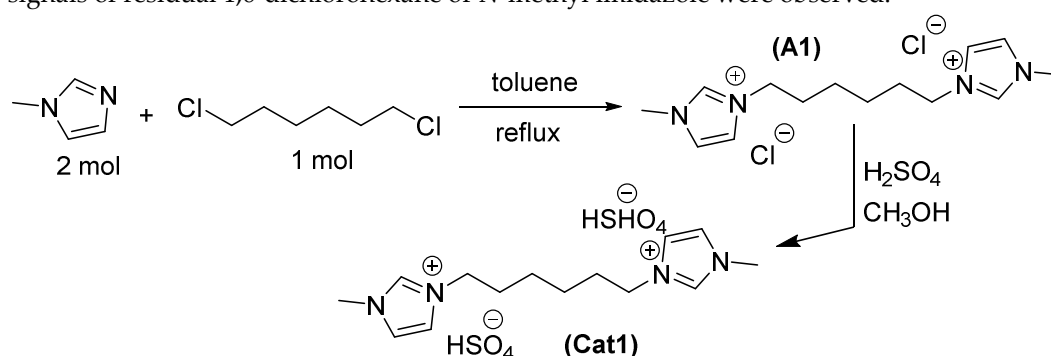

**Scheme S1.** Preparation of the ionic liquid catalyst **Cat1**.

### 1.2 Preparation of the ionic liquid catalyst **Cat2**

7.91 g (10 mmol) pyridine was mixed with 7.75 g (5 mmol) 1,6-dichlorohexane in 100 mL toluene and the mixture was heated under reflux overnight. The solvent was evaporated under vacuum. The thus obtained sample **(A2)** (10 mmol, 3.13 g, 99% yield) was dissolved in 100 mL MeOH, 1.96 g (20 mmol) sulfuric acid was added and the mixture stirred for 3 h. The reaction mixture was evaporated to dryness removing solvent and HCl from the mixture. The product was dried in vacuo (Scheme S2). Yield: 4.32 g (9.9 mmol, 99%) off-white powder.  $C_{16}H_{24}N_2O_8S_2$  (436.49 g/mol). Elemental analysis calc. (found): C 44.03 (44.10), H 5.54 (5.55), 6.42 (6.44) %.  $^1H$  NMR (300 MHz, DMSO- $d_6$ )  $\delta$  = 9.13 (m, 4H), 8.65 (m, 2H,  $J$  = 7.7 Hz), 8.18 (m, 4H,  $J$  = 6.5 Hz), 4.74 (m, 4H,  $J$  = 7.5 Hz), 2.12 (m, 4H), 1.57 (m, 4H) ppm. No signals of residual 1,6-dichlorohexane or pyridine were observed.

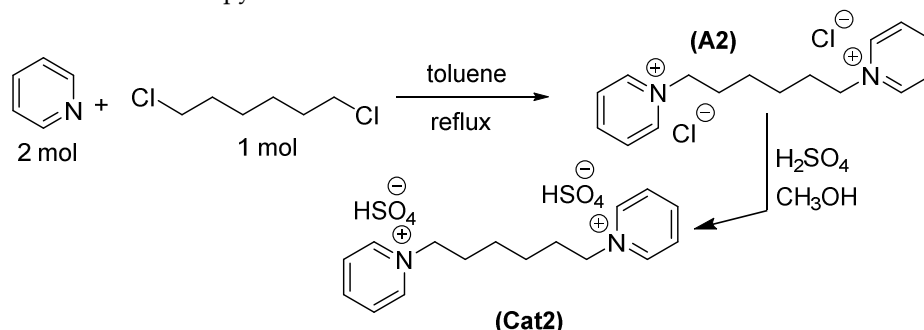

**Scheme S2.** Preparation of the ionic liquid catalyst **Cat2**

### 1.3 Synthesis of ethyl 1'-R<sub>2</sub>-2',5-dioxo-4-(R<sub>1</sub>-amino)-5H-spiro[5-R<sub>3</sub>-furan-2,3'-indoline]-3-carboxylates – general optimized procedure

In a 50 mL flask equipped with a condenser, the ionic liquid catalyst (**Cat1**) (30 mol%) was added to a mixture of the aniline (1 mmol), diethyl acetylene dicarboxylate (0.17 g, 1 mmol), and 1-R<sub>2</sub>-indoline-2,3-dione (1 mmol) in 20 mL EtOH under stirring. The mixture was irradiated using an ultrasonic bath at 80 °C for a given period of time. The progress of the reaction was monitored by thin-layer chromatography (TLC). After completeness of the reaction, the solvent was evaporated to dryness and the residual solid was suspended in 5 mL EtOH and cooled. After centrifugation, the suspension was carefully poured through a 2 cm thick silica sludge deposited on a glass filter which collected the precipitated catalyst and polymeric by-products (yellow to brown sticky oil), while the pure products were obtained from the filtrate.

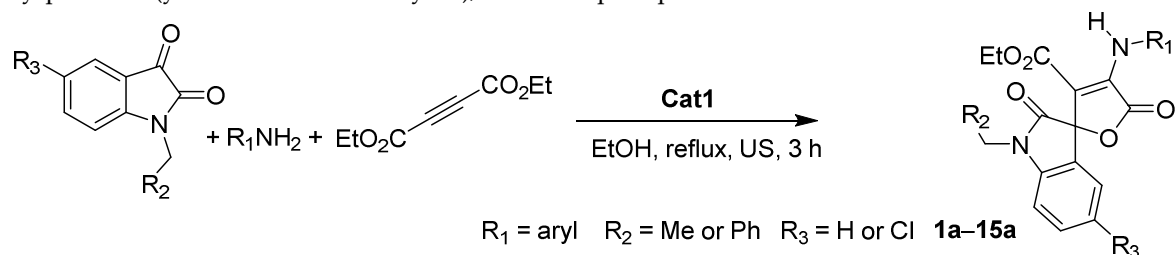

**Scheme S3.** Synthesis of ethyl 1'-R<sub>2</sub>-2',5-dioxo-4-(R<sub>1</sub>-amino)-5H-spiro[5-R<sub>3</sub>-furan-2,3'-indoline]-3-carboxylates

#### **1a**, Ethyl 1'-ethyl-2',5-dioxo-4-(phenylamino)-5H-spiro[furan-2,3'-indoline]-3-carboxylate

From 0.093 g aniline (1 mmol), 0.17 g diethyl acetylene dicarboxylate (1 mmol), and 0.175 g 1-ethylindoline-2,3-dione (1 mmol) in 20 mL EtOH for 3 h. Using **Cat1**: Yield 0.376 g (0.96 mmol, 96%), **Cat2**: Yield 0.345 g (0.88 mmol, 88%) colorless solid, m.p.: 219–221 °C; <sup>1</sup>H NMR (500 MHz, DMSO-*d*<sub>6</sub>): δ = 8.95 (s, 1H), 7.47 (t, *J* = 7.8 Hz, 1H), 7.31 (d, *J* = 7.8 Hz, 1H), 7.25 (t, *J* = 7.8 Hz, 2H), 7.16 (t, *J* = 7.8 Hz, 1H), 7.06–7.10 (m, 3H), 6.96 (d, *J* = 7.8 Hz, 1H), 4.11 (q, *J* = 6.8 Hz, 2H), 3.95 (q, *J* = 7.1 Hz, 2H), 1.24–1.28 (m, 6H) ppm; <sup>13</sup>C NMR (125 MHz, DMSO-*d*<sub>6</sub>): δ = 14.2, 14.7, 48.7, 56.7, 89.4, 104.2, 114.1, 119.2, 120.3, 123.1, 124.5, 129.9, 134.5, 135.1, 143.8, 151.7, 155.1, 164.5, 169.3, 179.1 ppm; Found: C, 67.26; H, 5.02; N, 7.09% C<sub>22</sub>H<sub>20</sub>N<sub>2</sub>O<sub>5</sub>; requires: C, 67.34; H, 5.14; N, 7.14%.

#### **2a**, Ethyl 1'-ethyl-2',5-dioxo-4-(*p*-tolylamino)-5H-spiro[furan-2,3'-indoline]-3-carboxylate

From 0.107 g 4-methylaniline (1 mmol), 0.17 g diethyl acetylene dicarboxylate (1 mmol), and 0.175 g 1-ethylindoline-2,3-dione (1 mmol) in 20 mL EtOH for 2.5 h. Using **Cat1**: Yield 0.398 g (0.98 mmol, 98%), **Cat2**: Yield 0.345 g (0.85 mmol, 85%). Colorless solid, m.p.: 223–225 °C; <sup>1</sup>H NMR (500 MHz, DMSO-*d*<sub>6</sub>): δ = 8.56 (s, 1H), 7.48 (t, *J* = 7.9 Hz, 1H), 7.32 (d, *J* = 7.9 Hz, 1H), 7.14–7.19 (m, 3H), 6.97–7.01 (m, 3H), 4.13 (q, *J* = 7.0 Hz, 2H), 3.97 (q, *J* = 7.3 Hz, 2H), 2.29 (s, 3H), 1.22–1.29 (m, 6H) ppm; <sup>13</sup>C NMR (125 MHz, DMSO-*d*<sub>6</sub>): δ = 14.3, 14.6, 21.4, 48.8, 56.4, 89.6, 104.1, 107.7, 112.3, 120.1, 124.6, 129.7, 134.1, 135.3, 137.1, 143.6, 151.9, 155.4, 164.8, 169.7, 178.7 ppm; Found: C, 67.87; H, 5.53; N, 6.83% C<sub>23</sub>H<sub>22</sub>N<sub>2</sub>O<sub>5</sub>; requires: C, 67.97; H, 5.46; N, 6.89%.

#### **3a**, Ethyl 4-((4-chlorophenyl)amino)-1'-ethyl-2',5-dioxo-5H-spiro[furan-2,3'-indoline]-3-carboxylate

From 0.127 g 4-chloroaniline (1 mmol), 0.17 g diethyl acetylene dicarboxylate (1 mmol), and 0.175 g 1-ethylindoline-2,3-dione (1 mmol) in 20 mL EtOH for 5 h. Using **Cat1**: Yield 0.362 g (0.85 mmol, 85%), **Cat2**: Yield 0.341 g (0.80 mmol, 80%) colorless solid, m.p.: 245–247 °C; <sup>1</sup>H NMR (500 MHz, DMSO-*d*<sub>6</sub>): δ = 9.32 (s, 1H), 7.49 (t, *J* = 8.2 Hz, 1H), 7.38 (d, *J* = 8.0 Hz, 2H), 7.32 (d, *J* = 8.2 Hz, 2H), 7.17 (t, *J* = 8.2 Hz, 1H), 7.09 (d, *J* = 8.0 Hz, 2H), 6.97 (d, *J* = 8.2 Hz, 1H), 4.13 (q, *J* = 7.0 Hz, 2H), 3.98 (q, *J* = 7.1 Hz, 2H), 1.21–1.29 (m, 6H) ppm; <sup>13</sup>C NMR (125 MHz, DMSO-*d*<sub>6</sub>): δ = 14.4, 15.1, 49.2, 56.5, 91.2, 106.3, 118.7, 120.3, 125.2, 127.9, 129.8, 134.4,

136.1, 143.7, 144.2, 152.3, 156.1, 165.7, 170.1, 179.4 ppm; Found: C, 61.86; H, 4.55; N, 6.63% C<sub>22</sub>H<sub>19</sub>ClN<sub>2</sub>O<sub>5</sub>; requires: C, 61.90; H, 4.49; N, 6.56%.

**4a**, Ethyl 1'-ethyl-2',5-dioxo-4-((4-methoxyphenyl)amino)-5*H*-spiro[furan-2,3'-indoline]-3-carboxylate

From 0.123 g 4-methoxyaniline (1 mmol), 0.17 g diethyl acetylene dicarboxylate (1 mmol), and 0.175 g 1-ethylindoline-2,3-dione (1 mmol) in 20 mL EtOH for 2.5 h. Using **Cat1**: Yield 0.414 g (0.98 mmol, 98%), **Cat2**: Yield 0.38 g (0.90 mmol, 90%) colorless solid, m.p.: 236–238°C; <sup>1</sup>H NMR (500 MHz, DMSO-d<sub>6</sub>): δ = 9.12 (s, 1H), 7.47 (t, *J* = 8.0 Hz, 1H), 7.31 (d, *J* = 8.0 Hz, 1H), 7.16 (t, *J* = 8.0 Hz, 1H), 7.03 (d, *J* = 8.1 Hz, 2H), 6.96 (d, *J* = 8.0 Hz, 1H), 6.87 (d, *J* = 8.1 Hz, 2H), 4.09 (q, *J* = 6.9 Hz, 2H), 3.96 (q, *J* = 6.8 Hz, 2H), 3.74 (s, 3H), 1.20–1.29 (m, 6H) ppm; <sup>13</sup>C NMR (125 MHz, DMSO-d<sub>6</sub>): δ = 14.4, 14.9, 48.3, 55.4, 56.3, 89.2, 103.2, 106.2, 110.3, 119.8, 124.1, 129.9, 134.4, 134.8, 143.2, 151.1, 155.1, 155.7, 164.1, 167.3, 176.1 ppm; Found: C, 65.33; H, 5.26; N, 6.58% C<sub>23</sub>H<sub>22</sub>N<sub>2</sub>O<sub>6</sub>; requires: C, 65.40; H, 5.25; N, 6.63%.

**5a**, Ethyl 4-((3,5-dimethylphenyl)amino)-1'-ethyl-2',5-dioxo-5*H*-spiro[furan-2,3'-indoline]-3-carboxylate

From 0.121 g 3,5-dimethylaniline (1 mmol), 0.17 g diethyl acetylene dicarboxylate (1 mmol), and 0.175 g 1-ethylindoline-2,3-dione (1 mmol) in 20 mL EtOH for 2 h. Using **Cat1**: Yield 0.407 g (0.97 mmol, 97%), **Cat2**: Yield 0.386 g (0.92 mmol, 92%) colorless solid, m.p.: 249–251°C; <sup>1</sup>H NMR (500 MHz, DMSO-d<sub>6</sub>): δ = 8.41 (s, 1H), 7.46 (t, *J* = 8.0 Hz, 1H), 7.30 (d, *J* = 8.0 Hz, 1H), 7.15 (t, *J* = 8.0 Hz, 1H), 6.95 (d, *J* = 8.0 Hz, 1H), 6.88 (s, 1H), 6.85 (s, 2H), 4.03 (q, *J* = 7.0 Hz, 2H), 3.92 (q, *J* = 7.1 Hz, 2H), 2.27 (s, 6H), 1.20–1.27 (m, 6H) ppm; <sup>13</sup>C NMR (125 MHz, DMSO-d<sub>6</sub>): δ = 14.3, 15.0, 21.6, 48.6, 56.5, 89.0, 105.2, 111.2, 116.7, 119.7, 124.2, 129.7, 134.1, 135.8, 137.3, 143.1, 151.0, 155.5, 163.8, 166.0, 178.1 ppm; Found: C, 68.45; H, 5.66; N, 6.58% C<sub>24</sub>H<sub>24</sub>N<sub>2</sub>O<sub>5</sub>; requires: C, 68.56; H, 5.75; N, 6.66%.

**6a**, Ethyl 4-((3,4-dimethylphenyl)amino)-1'-ethyl-2',5-dioxo-5*H*-spiro[furan-2,3'-indoline]-3-carboxylate

From 0.121 g 3,4-dimethylaniline (1 mmol), 0.17 g diethyl acetylene dicarboxylate (1 mmol), and 0.175 g 1-ethylindoline-2,3-dione (1 mmol) in 20 mL EtOH for 2 h. Using **Cat1**: Yield 0.403 g (0.96 mmol, 96%), **Cat2**: Yield 0.378 g (0.90 mmol, 90%) colorless solid, m.p.: 247–249°C; <sup>1</sup>H NMR (500 MHz, DMSO-d<sub>6</sub>): δ = 7.89 (s, 1H), 7.46 (t, *J* = 8.2 Hz, 1H), 7.31 (d, *J* = 8.2 Hz, 1H), 7.15 (t, *J* = 8.2 Hz, 1H), 7.07 (d, *J* = 7.8 Hz, 1H), 7.04 (d, *J* = 7.8 Hz, 1H), 6.98 (s, 1H), 6.95 (d, *J* = 8.2 Hz, 1H), 4.04 (q, *J* = 7.0 Hz, 2H), 3.93 (q, *J* = 7.0 Hz, 2H), 2.78 (s, 3H), 2.26 (s, 3H), 1.27 (t, *J* = 7.0 Hz, 3H), 1.22 (t, *J* = 7.0 Hz, 3H) ppm; <sup>13</sup>C NMR (125 MHz, DMSO-d<sub>6</sub>): δ = 14.3, 14.9, 20.8, 21.3, 48.7, 56.5, 89.4, 105.7, 109.9, 112.4, 116.1, 119.8, 124.5, 129.8, 134.2, 135.4, 136.8, 137.1, 143.3, 151.1, 155.6, 163.7, 166.2, 177.7 ppm; Found: C, 68.57; H, 5.69; N, 6.65% C<sub>24</sub>H<sub>24</sub>N<sub>2</sub>O<sub>5</sub>; requires: C, 68.56; H, 5.75; N, 6.66%.

**7a**, Ethyl 4-((3,5-dimethoxyphenyl)amino)-1'-ethyl-2',5-dioxo-5*H*-spiro[furan-2,3'-indoline]-3-carboxylate

From 0.153 g 3,5-dimethoxyaniline (1 mmol), 0.17 g diethyl acetylene dicarboxylate (1 mmol), and 0.175 g 1-ethylindoline-2,3-dione (1 mmol) in 20 mL EtOH for 2 h. Using **Cat1**: Yield 0.420 g (0.93 mmol, 93%), **Cat2**: Yield 0.434 g (0.96 mmol, 96%) colorless solid, m.p.: 255–257°C; <sup>1</sup>H NMR (500 MHz, DMSO-d<sub>6</sub>): δ = 8.36 (s, 1H), 7.47 (t, *J* = 8.1 Hz, 1H), 7.31 (d, *J* = 8.1 Hz, 1H), 7.16 (t, *J* = 8.1 Hz, 1H), 6.96 (d, *J* = 8.1 Hz, 1H), 6.81 (s, 1H), 6.73 (s, 2H), 4.08 (q, *J* = 7.0 Hz, 2H), 3.95 (q, *J* = 6.9 Hz, 2H), 3.71 (s, 6H), 1.20–1.28 (m, 6H) ppm; <sup>13</sup>C NMR (125 MHz, DMSO-d<sub>6</sub>): δ = 14.1, 15.0, 48.6, 55.6, 56.7, 88.7, 104.2, 105.8, 109.7, 119.8, 124.4, 129.7, 134.0, 135.6, 143.2, 150.7, 155.2, 155.8, 163.1, 165.2, 174.1 ppm; Found: C, 63.73; H, 5.37; N, 6.19% C<sub>24</sub>H<sub>24</sub>N<sub>2</sub>O<sub>7</sub>; requires: C, 63.71; H, 5.35; N, 6.19%.

**8a**, Ethyl 1'-ethyl-4-((4-ethylphenyl)amino)-2',5-dioxo-5*H*-spiro[furan-2,3'-indoline]-3-carboxylate

From 0.121 g 4-ethylaniline (1 mmol), 0.17 g diethyl acetylene dicarboxylate (1 mmol), and 0.175 g 1-ethylindoline-2,3-dione (1 mmol) in 20 mL EtOH for 2.5 h. Using **Cat1**: Yield 0.395 g (0.94 mmol, 94%), **Cat2**: Yield 0.391 g (0.93 mmol, 93%). Colorless solid, m.p.: 231–233°C; <sup>1</sup>H NMR (500 MHz, DMSO-d<sub>6</sub>): δ = 7.96 (s,

1H), 7.47 (t,  $J$  = 8.0 Hz, 1H), 7.32 (d,  $J$  = 8.0 Hz, 1H), 7.16 (t,  $J$  = 8.0 Hz, 1H), 7.09 (d,  $J$  = 7.8 Hz, 2H), 7.01 (d,  $J$  = 7.8 Hz, 2H), 6.96 (d,  $J$  = 8.0 Hz, 1H), 4.08 (q,  $J$  = 6.8 Hz, 2H), 3.96 (q,  $J$  = 6.8 Hz, 2H), 2.19 (q,  $J$  = 7.0 Hz, 2H), 1.22–1.30 (m, 6H), 1.04 (t,  $J$  = 7.0 Hz, 3H) ppm;  $^{13}\text{C}$  NMR (125 MHz, DMSO- $d_6$ ):  $\delta$  = 13.9, 14.4, 15.0, 24.8, 48.6, 56.5, 89.1, 104.5, 111.1, 115.3, 119.9, 124.5, 129.8, 134.2, 135.4, 137.7, 143.4, 151.2, 155.6, 164.2, 168.7, 177.1 ppm; Found: C, 68.66; H, 5.89; N, 6.74%  $\text{C}_{24}\text{H}_{24}\text{N}_2\text{O}_5$ ; requires: C, 68.56; H, 5.75; N, 6.66%.

**9a**, Ethyl 1'-benzyl-2',5-dioxo-4-(*p*-tolylamino)-5*H*-spiro[furan-2,3'-indoline]-3-carboxylate (**Table 2**, **9a**):

From 0.107 g 4-methylaniline (1 mmol), 0.17 g diethyl acetylene dicarboxylate (1 mmol), and 0.237 g 1-bezylindoline-2,3-dione (1 mmol) in 20 mL EtOH for 3.5 h. Using **Cat1**: Yield 0.426 g (0.91 mmol, 91%), **Cat2**: Yield 0.417 g (0.89 mmol, 89%) colorless solid, m.p.: 261–263°C;  $^1\text{H}$  NMR (500 MHz, DMSO- $d_6$ ):  $\delta$  = 7.76 (s, 1H), 7.49 (t,  $J$  = 8.0 Hz, 1H), 7.34 (d,  $J$  = 8.0 Hz, 1H), 7.13–7.25 (m, 6H), 7.03 (d,  $J$  = 8.0 Hz, 2H), 6.97 (d,  $J$  = 8.0 Hz, 1H), 6.91 (d,  $J$  = 8.0 Hz, 2H), 4.58 (d,  $J$  = 10.8 Hz, 1H), 4.48 (d,  $J$  = 10.8 Hz, 1H), 4.16 (q,  $J$  = 6.8 Hz, 2H), 2.28 (s, 3H), 1.31 (t,  $J$  = 6.8 Hz, 3H) ppm;  $^{13}\text{C}$  NMR (125 MHz, DMSO- $d_6$ ):  $\delta$  = 15.8, 21.4, 56.7, 74.6, 91.7, 105.7, 112.2, 116.3, 121.2, 124.7, 127.6, 128.8, 129.1, 129.8, 134.6, 136.7, 137.8, 138.6, 143.2, 151.5, 155.1, 167.2, 169.7, 177.7 ppm; Found: C, 71.85; H, 5.22; N, 5.91%  $\text{C}_{28}\text{H}_{24}\text{N}_2\text{O}_5$ ; requires: C, 71.78; H, 5.16; N, 5.98%.

**10a**, Ethyl 1'-benzyl-4-((4-chlorophenyl)amino)-2',5-dioxo-5*H*-spiro[furan-2,3'-indoline]-3-carboxylate

From 0.127 g 4-chloroaniline (1 mmol), 0.17 g diethyl acetylene dicarboxylate (1 mmol), and 0.237 g 1-bezylindoline-2,3-dione (1 mmol) in 20 mL EtOH for 5 h. Using **Cat1**: Yield 0.464 g (0.95 mmol, 95%), **Cat2**: Yield 0.439 g (0.90 mmol, 90%) colorless solid, m.p.: 271–273°C;  $^1\text{H}$  NMR (500 MHz, DMSO- $d_6$ ):  $\delta$  = 8.87 (s, 1H), 7.50 (t,  $J$  = 8.2 Hz, 1H), 7.41 (d,  $J$  = 7.8 Hz, 2H), 7.35 (d,  $J$  = 8.2 Hz, 1H), 7.14–7.26 (m, 6H), 7.08 (d,  $J$  = 7.8 Hz, 2H), 6.96 (d,  $J$  = 8.2 Hz, 1H), 4.60 (d,  $J$  = 10.9 Hz, 1H), 4.51 (d,  $J$  = 10.8 Hz, 1H), 4.14 (q,  $J$  = 6.8 Hz, 2H), 1.30 (t,  $J$  = 6.9 Hz, 3H) ppm;  $^{13}\text{C}$  NMR (125 MHz, DMSO- $d_6$ ):  $\delta$  = 16.1, 57.1, 74.9, 92.3, 106.1, 121.3, 124.8, 127.2, 127.8, 128.4, 129.0, 129.4, 130.1, 134.7, 136.6, 138.7, 143.6, 144.2, 151.4, 155.3, 167.7, 170.1, 178.4 ppm; Found: C, 66.42; H, 4.39; N, 5.67%  $\text{C}_{27}\text{H}_{21}\text{ClN}_2\text{O}_5$ ; requires: C, 66.33; H, 4.33; N, 5.73%.

**11a**, Ethyl 1'-benzyl-4-((4-methoxyphenyl)amino)-2',5-dioxo-5*H*-spiro[furan-2,3'-indoline]-3-carboxylate

From 0.123 g 4-methoxyaniline (1 mmol), 0.17 g diethyl acetylene dicarboxylate (1 mmol), and 0.237 g 1-bezylindoline-2,3-dione (1 mmol) in 20 mL EtOH for 3h. Using **Cat1**: Yield 0.465 g (0.96 mmol, 96%), **Cat2**: Yield 0.441 g (0.91 mmol, 91%) colorless solid, m.p.: 277–279°C;  $^1\text{H}$  NMR (500 MHz, DMSO- $d_6$ ):  $\delta$  = 8.47 (s, 1H), 7.49 (t,  $J$  = 8.2 Hz, 1H), 7.35 (d,  $J$  = 8.1 Hz, 1H), 7.25 (d,  $J$  = 7.8 Hz, 2H), 7.13–7.21 (m, 4H), 6.96 (d,  $J$  = 8.1 Hz, 1H), 6.91 (d,  $J$  = 7.8 Hz, 2H), 6.81 (d,  $J$  = 7.8 Hz, 2H), 4.60 (d,  $J$  = 11.0 Hz, 1H), 4.50 (d,  $J$  = 11.0 Hz, 1H), 4.11 (q,  $J$  = 6.8 Hz, 2H), 3.69 (s, 3H), 1.30 (t,  $J$  = 6.8 Hz, 3H) ppm;  $^{13}\text{C}$  NMR (125 MHz, DMSO- $d_6$ ):  $\delta$  = 16.0, 55.2, 56.8, 74.3, 92.0, 105.8, 107.3, 110.8, 121.0, 124.4, 127.4, 128.2, 129.2, 130.0, 134.3, 135.1, 138.5, 143.4, 151.2, 155.4, 155.7, 166.3, 169.1, 175.2 ppm; Found: C, 69.49; H, 5.01; N, 5.78%  $\text{C}_{28}\text{H}_{24}\text{N}_2\text{O}_6$ ; requires: C, 69.41; H, 4.99; N, 5.78%.

**12a**, Ethyl 1'-benzyl-5'-chloro-2',5-dioxo-4-(*p*-tolylamino)-5*H*-spiro[furan-2,3'-indoline]-3-carboxylate

From 0.107 g 4-methylaniline (1 mmol), 0.17 g diethyl acetylene dicarboxylate (1 mmol), and 0.271 g 1-benzyl-5-chloroindoline-2,3-dione (1 mmol) in 20 mL EtOH for 2.5 h. Using **Cat1**: Yield 0.472 g (0.94 mmol, 94%), **Cat2**: Yield 0.462 g (0.92 mmol, 92%) colorless solid, m.p.: 281–283°C;  $^1\text{H}$  NMR (500 MHz, DMSO- $d_6$ ):  $\delta$  = 8.87 (s, 1H), 6.93–7.29 (m, 12H), 4.62 (d,  $J$  = 11.0 Hz, 1H), 4.53 (d,  $J$  = 11.0 Hz, 1H), 4.10 (q,  $J$  = 6.8 Hz, 2H), 2.25 (s, 3H), 1.28 (t,  $J$  = 6.8 Hz, 3H) ppm;  $^{13}\text{C}$  NMR (125 MHz, DMSO- $d_6$ ):  $\delta$  = 16.3, 21.2, 56.7, 74.7, 93.1, 106.8, 112.3, 116.8, 122.3, 126.7, 127.4, 128.4, 129.3, 132.3, 135.3, 136.4, 137.5, 143.6, 144.6, 151.5, 155.6, 166.7, 170.1, 176.4 ppm; Found: C, 66.87; H, 4.60; N, 5.59%  $\text{C}_{28}\text{H}_{23}\text{ClN}_2\text{O}_5$ ; requires: C, 66.87; H, 4.61; N, 5.57%.

**13a**, Ethyl 1'-benzyl-5'-chloro-4-((4-chlorophenyl)amino)-2',5-dioxo-5*H*-spiro[furan-2,3'-indoline]-3-carboxylate

From 0.127 g 4-chloroaniline (1 mmol), 0.17 g diethyl acetylene dicarboxylate (1 mmol), and 0.271 g 1-benzyl-5-chloroindoline-2,3-dione (1 mmol) in 20 mL EtOH for 5 h. Using **Cat1**: Yield 0.496 g (0.95 mmol, 95%), **Cat2**: Yield 0.486 g (0.93 mmol, 93%) colorless solid, m.p.: 278–280°C; <sup>1</sup>H NMR (500 MHz, DMSO-d<sub>6</sub>): δ = 8.96 (s, 1H), 7.41 (d, *J* = 7.8 Hz, 2H), 7.14–7.30 (m, 7H), 7.09 (d, *J* = 7.8 Hz, 2H), 6.96 (d, *J* = 8.0 Hz, 1H), 4.61 (d, *J* = 10.6 Hz, 1H), 4.51 (d, *J* = 10.6 Hz, 1H), 4.11 (q, *J* = 6.8 Hz, 2H), 1.29 (t, *J* = 6.9 Hz, 3H) ppm; <sup>13</sup>C NMR (125 MHz, DMSO-d<sub>6</sub>): δ = 16.4, 56.6, 76.1, 94.2, 106.7, 122.1, 126.4, 127.1, 127.6, 128.1, 128.5, 129.4, 132.1, 135.4, 136.8, 143.2, 143.8, 144.5, 151.6, 155.7, 166.5, 170.6, 178.4 ppm; Found: C, 61.84; H, 3.77; N, 5.26% C<sub>27</sub>H<sub>20</sub>Cl<sub>2</sub>N<sub>2</sub>O<sub>5</sub>; requires: C, 61.96; H, 3.85; N, 5.35%.

**14a**, Ethyl 1'-benzyl-5'-chloro-4-((4-methoxyphenyl)amino)-2',5'-dioxo-5H-spiro[furan-2,3'-indoline]-3-carboxylate

From 0.123 g 4-methoxyaniline (1 mmol), 0.17 g diethyl acetylene dicarboxylate (1 mmol), and 0.271 g 1-benzyl-5-chloroindoline-2,3-dione (1 mmol) in 20 mL EtOH for 3.5 h. Using **Cat1**: Yield 0.472 g (0.91 mmol, 91%), **Cat2**: Yield 0.471 g (0.91 mmol, 91%) colorless solid, m.p.: 272–274°C; <sup>1</sup>H NMR (500 MHz, DMSO-d<sub>6</sub>): δ = 8.56 (s, 1H), 7.13–7.29 (m, 7H), 6.96 (d, *J* = 8.2 Hz, 1H), 6.89 (d, *J* = 7.8 Hz, 2H), 6.77 (d, *J* = 7.9 Hz, 2H), 4.59 (d, *J* = 10.8 Hz, 1H), 4.49 (d, *J* = 10.8 Hz, 1H), 4.09 (q, *J* = 6.9 Hz, 2H), 3.89 (s, 3H), 1.28 (t, *J* = 6.9 Hz, 3H) ppm; <sup>13</sup>C NMR (125 MHz, DMSO-d<sub>6</sub>): δ = 15.8, 55.4, 56.1, 75.2, 93.8, 106.1, 108.4, 112.3, 121.7, 126.0, 127.3, 128.4, 129.2, 132.0, 135.1, 135.4, 143.1, 144.3, 151.2, 155.3, 155.5, 165.2, 169.6, 177.1 ppm; Found: C, 64.75; H, 4.41; N, 5.33% C<sub>28</sub>H<sub>23</sub>ClN<sub>2</sub>O<sub>6</sub>; requires: C, 64.81; H, 4.47; N, 5.40%.

**15a**, Ethyl 1'-benzyl-5'-chloro-4-((4-ethylphenyl)amino)-2',5'-dioxo-5H-spiro[furan-2,3'-indoline]-3-carboxylate

From 0.121 g 4-ethylaniline (1 mmol), 0.17 g diethyl acetylene dicarboxylate (1 mmol), and 0.271 g 1-benzyl-5-chloroindoline-2,3-dione (1 mmol) in 20 mL EtOH for 4 h. Using **Cat1**: Yield 0.496 g (0.96 mmol, 96%), **Cat2**: Yield 0.480 g (0.93 mmol, 93%) colorless solid, m.p.: 275–277°C; <sup>1</sup>H NMR (500 MHz, DMSO-d<sub>6</sub>): δ = 8.36 (s, 3H), 6.95–7.30 (m, 12H), 4.59 (d, *J* = 10.8 Hz, 1H), 4.46 (d, *J* = 10.8 Hz, 1H), 4.08 (q, *J* = 6.8 Hz, 2H), 2.35 (q, *J* = 6.8 Hz, 2H), 1.29 (t, *J* = 6.8 Hz, 3H), 0.98 (t, *J* = 6.8 Hz, 3H) ppm; <sup>13</sup>C NMR (125 MHz, DMSO-d<sub>6</sub>): δ = 14.6, 15.7, 24.3, 56.1, 75.1, 93.5, 106.1, 112.4, 117.3, 121.8, 125.9, 127.3, 128.4, 129.2, 132.1, 135.3, 135.8, 136.8, 143.1, 144.4, 151.2, 155.5, 165.6, 169.1, 177.4 ppm; Found: C, 67.43; H, 4.96; N, 5.48% C<sub>29</sub>H<sub>25</sub>ClN<sub>2</sub>O<sub>5</sub>; requires: C, 67.38; H, 4.87; N, 5.42%.

## 2. Supplementary Figures

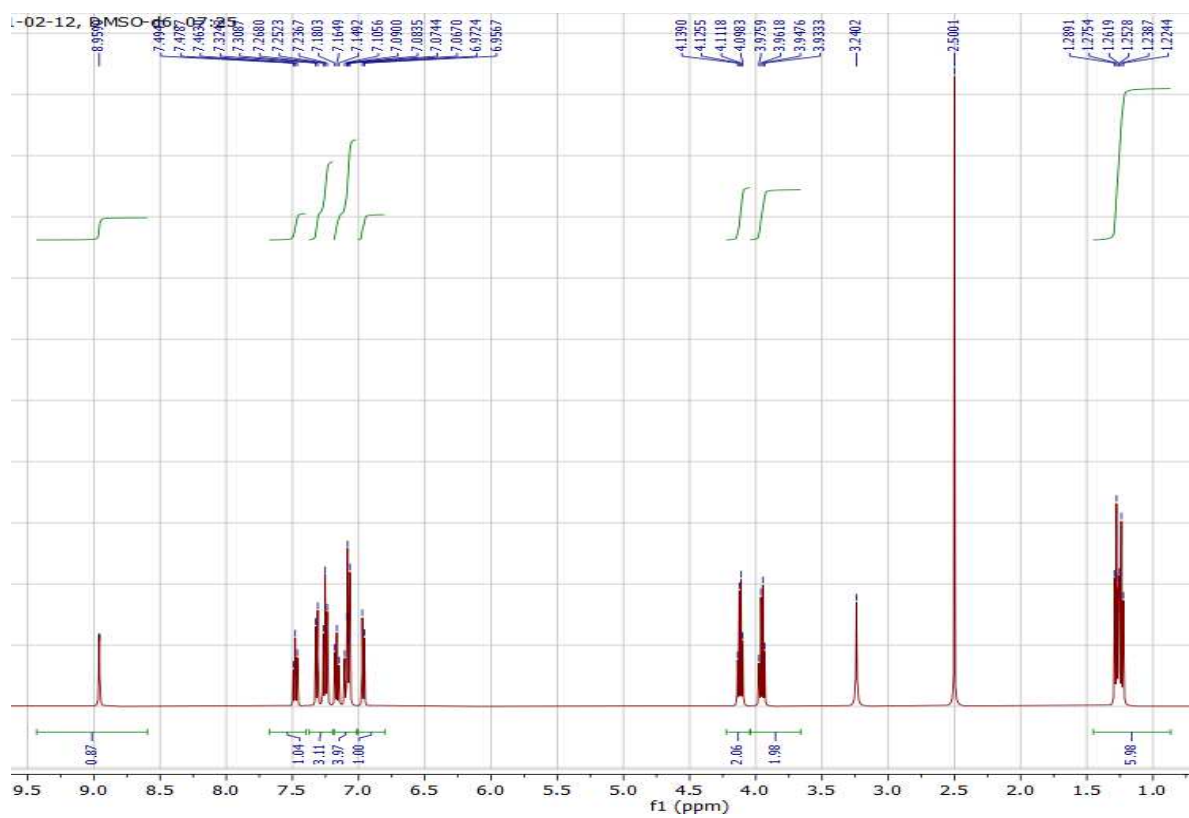

**Figure S1.** <sup>1</sup>H NMR spectrum of **1a** in DMSO-d<sub>6</sub>

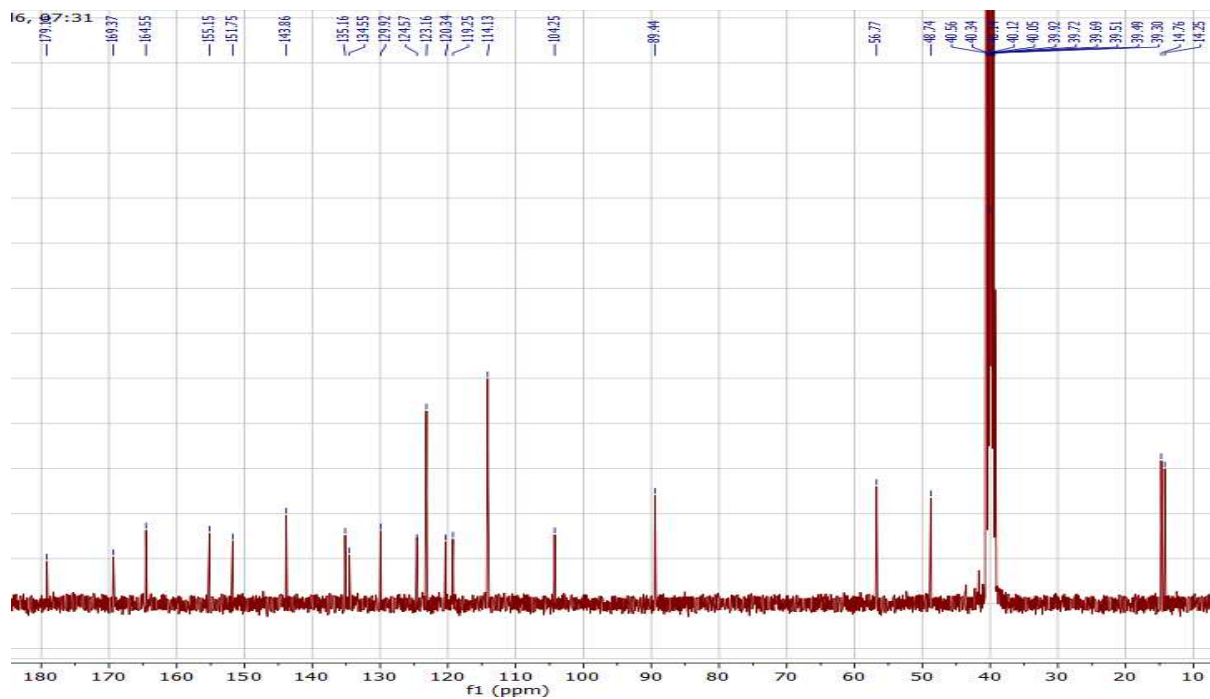

**Figure S2.** <sup>13</sup>C NMR spectrum of **1a** in DMSO-d<sub>6</sub>



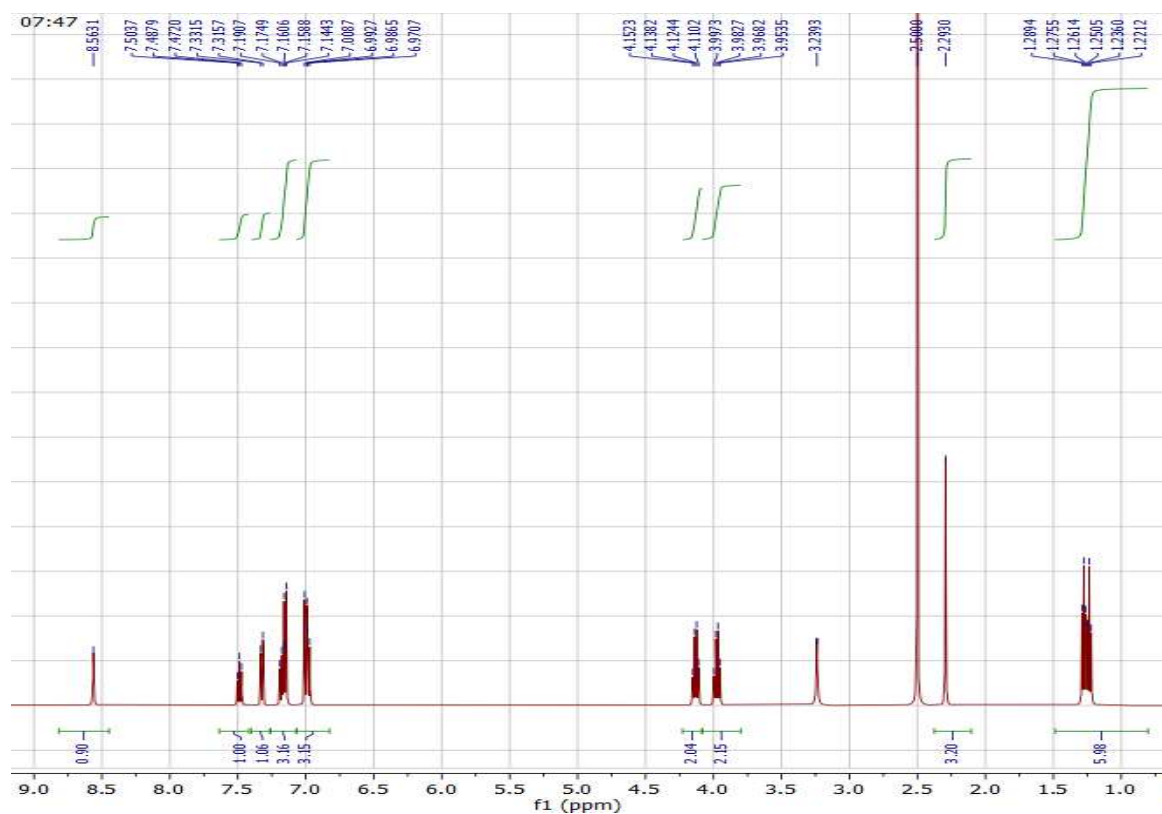

**Figure S3.  $^1\text{H}$  NMR spectrum of **2a** in  $\text{DMSO-d}_6$**

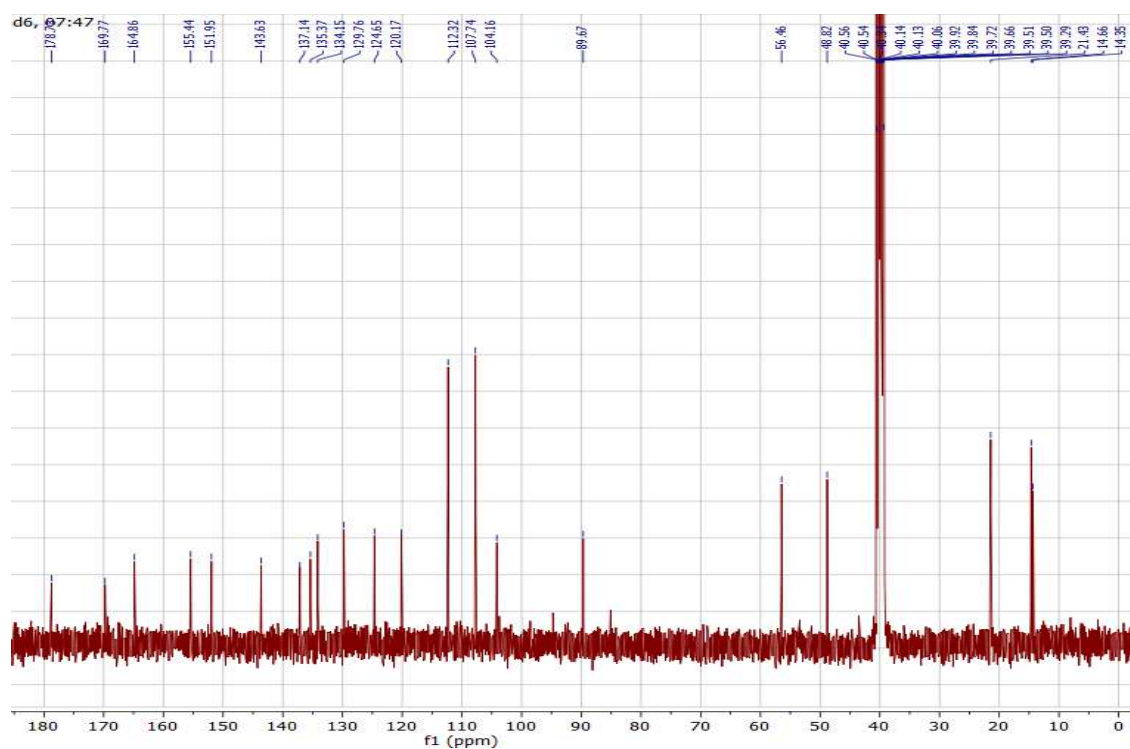

**Figure S4.  $^{13}\text{C}$  NMR spectrum of **2a** in  $\text{DMSO-d}_6$**

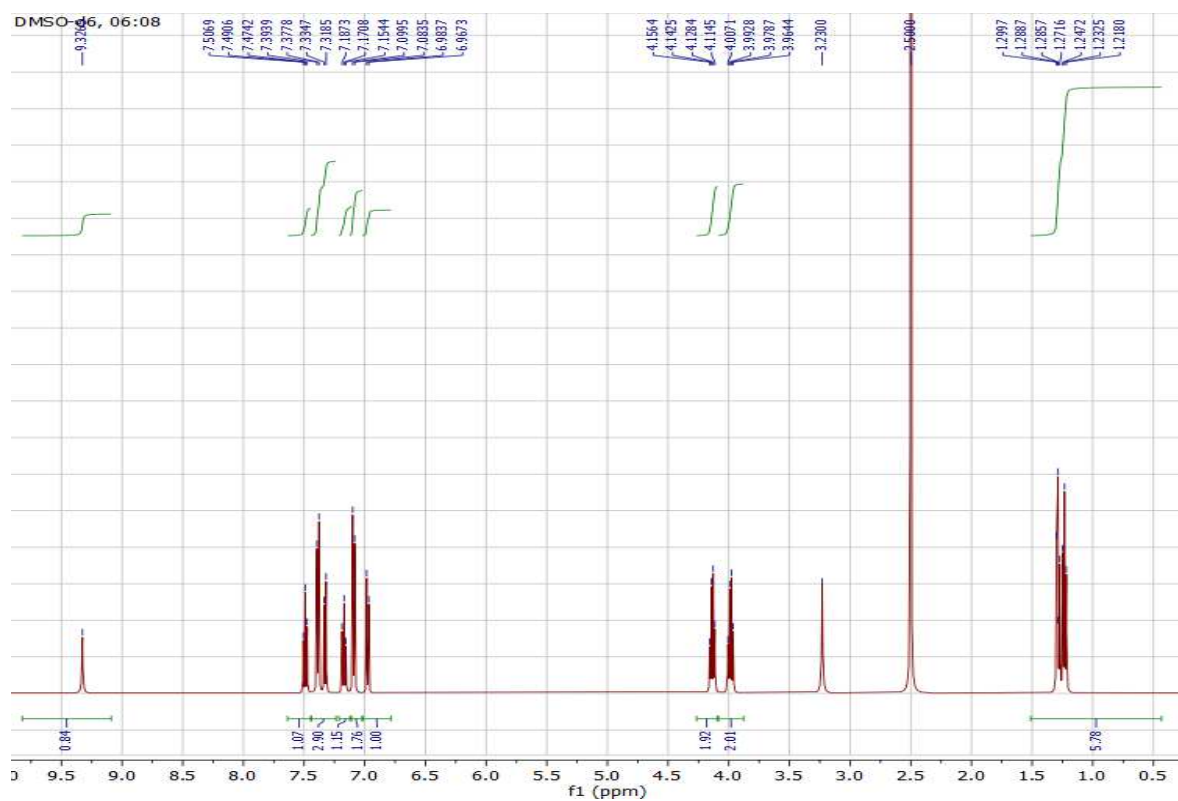

**Figure S5.** <sup>1</sup>H NMR spectrum of **3a** in DMSO-d<sub>6</sub>

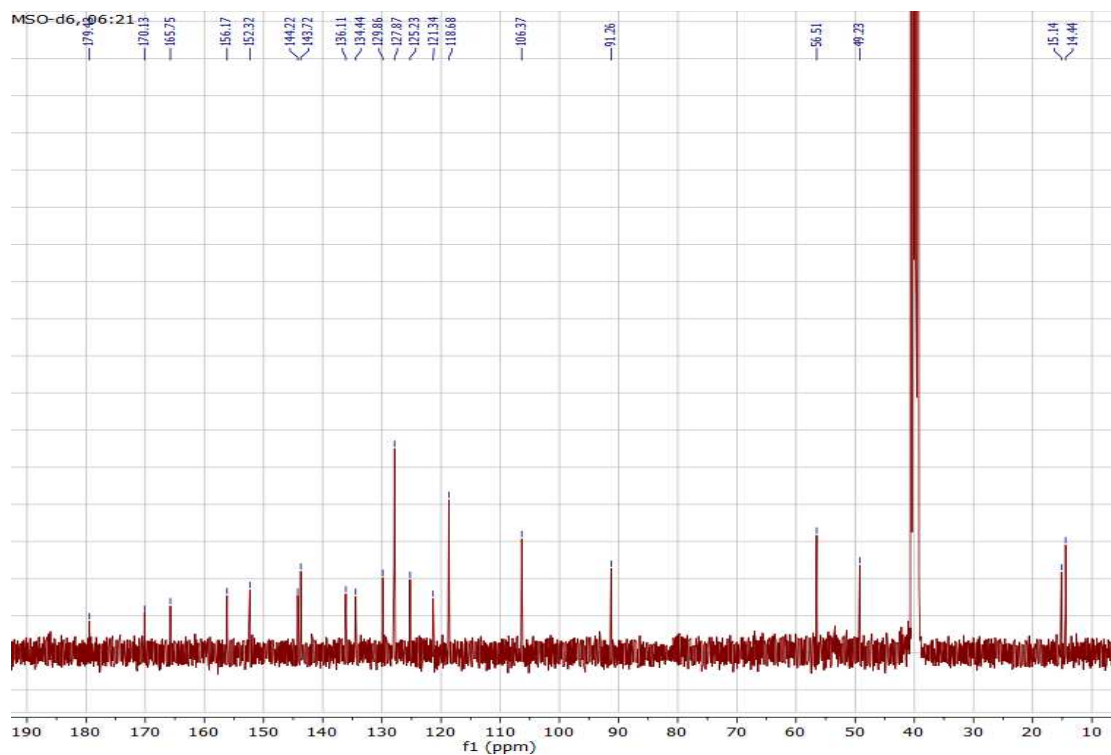

**Figure S6.** <sup>13</sup>C NMR spectrum of **3a** in DMSO-d<sub>6</sub>

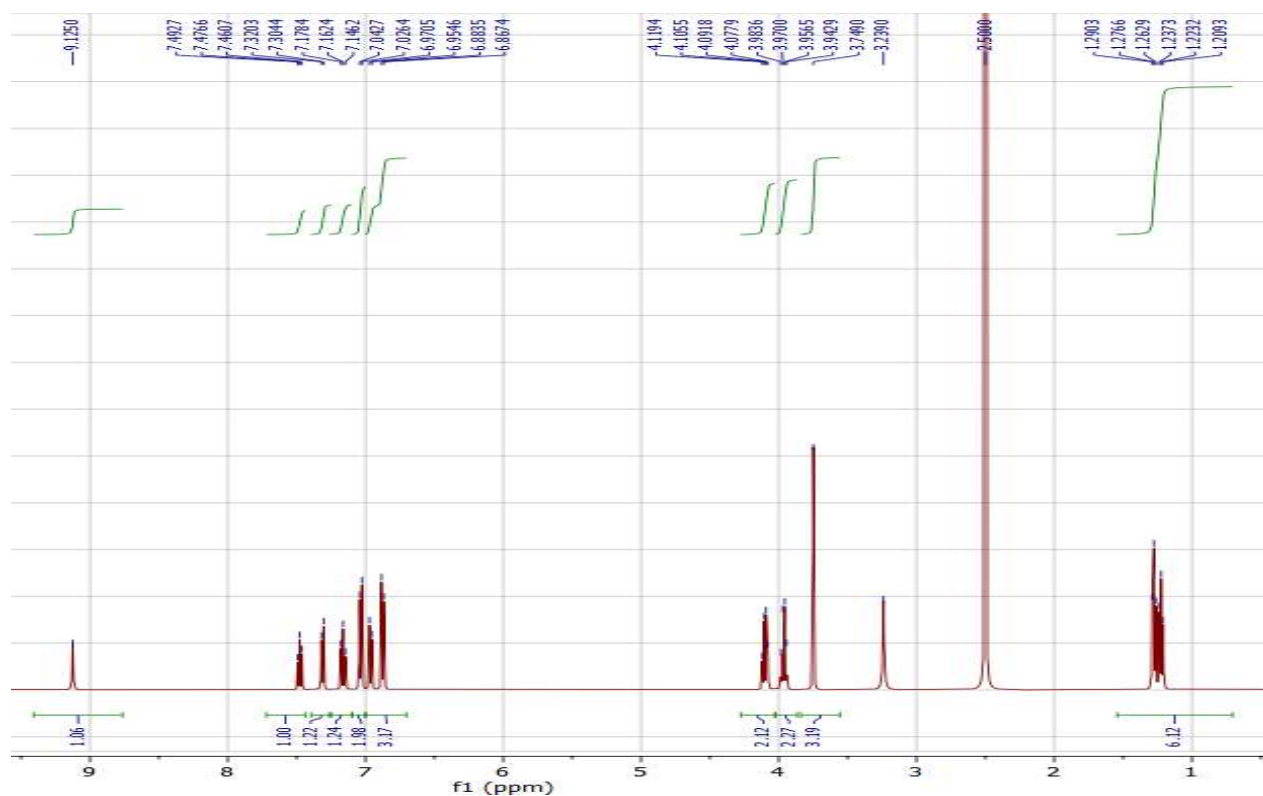

**Figure S7.** <sup>1</sup>H NMR spectrum of **4a** in DMSO-d<sub>6</sub> in DMSO-d<sub>6</sub>

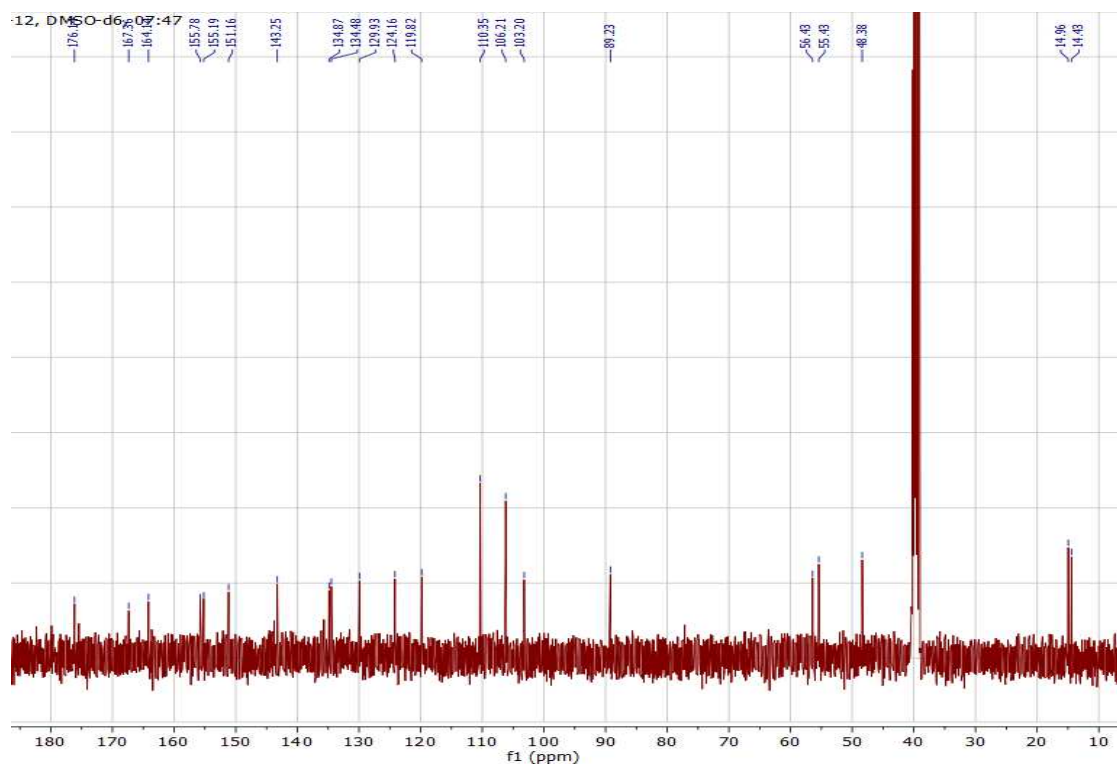

**Figure S8.** <sup>13</sup>C NMR spectrum of **4a** in DMSO-d<sub>6</sub>

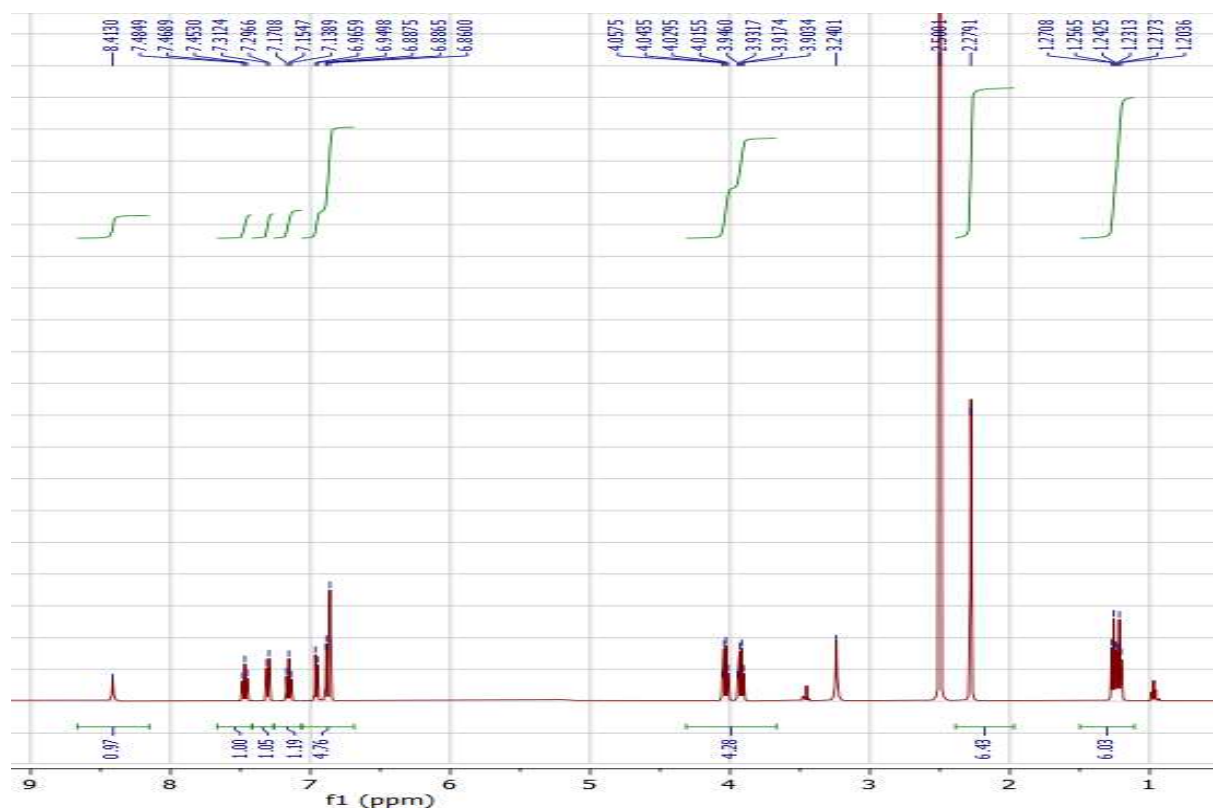

Figure S9. <sup>1</sup>H NMR spectrum of 5a in DMSO-d<sub>6</sub>

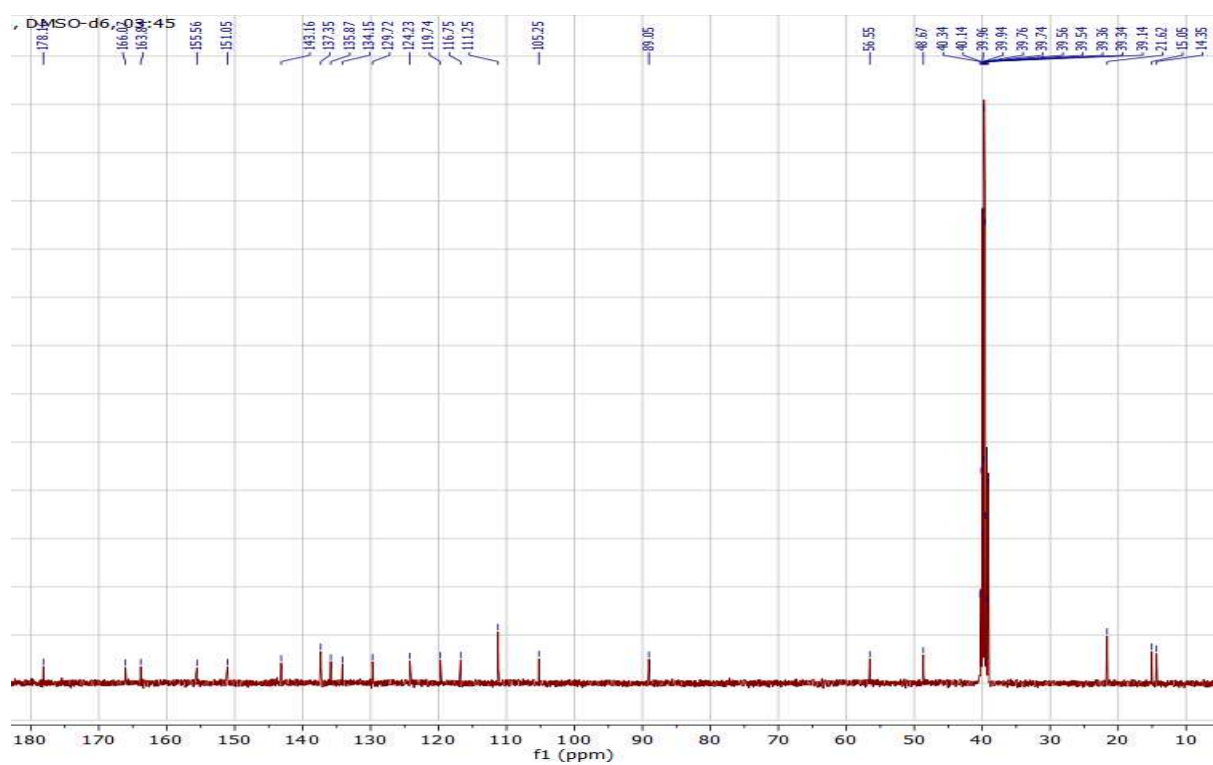

Figure S10. <sup>13</sup>C NMR spectrum of 5a in DMSO-d<sub>6</sub>

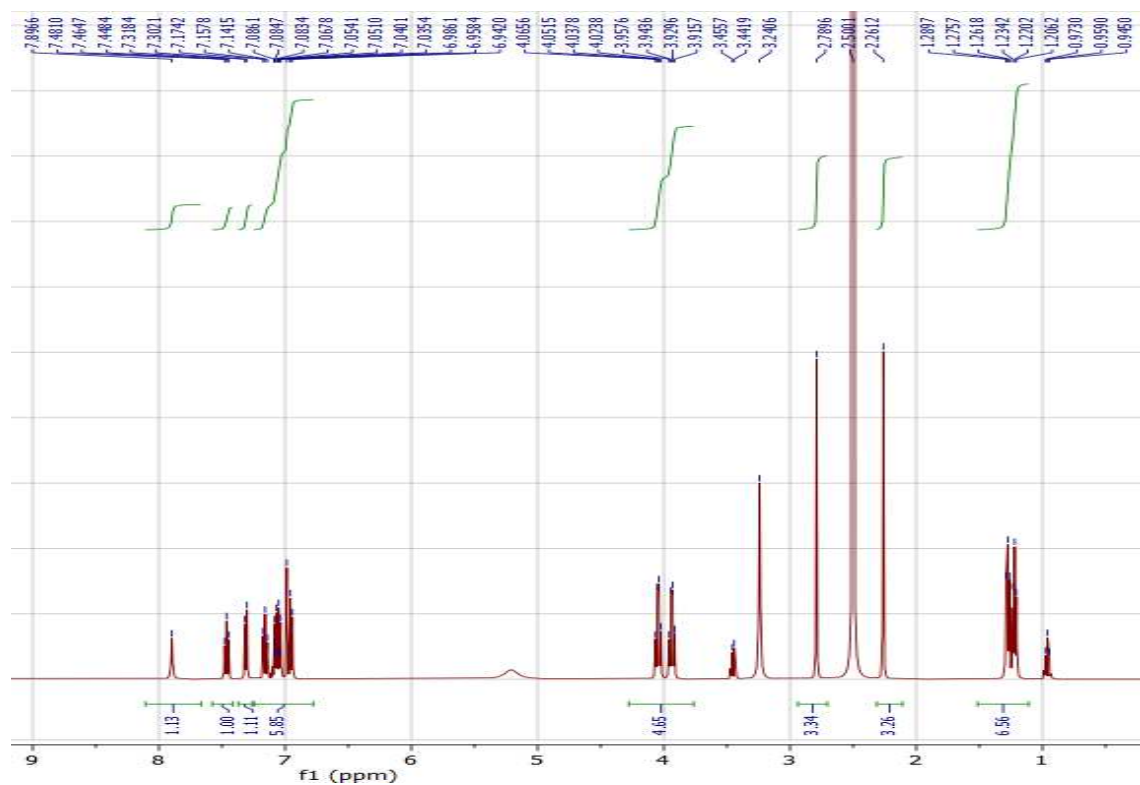

**Figure S11.** <sup>1</sup>H NMR spectrum of **6a** in DMSO-d<sub>6</sub>

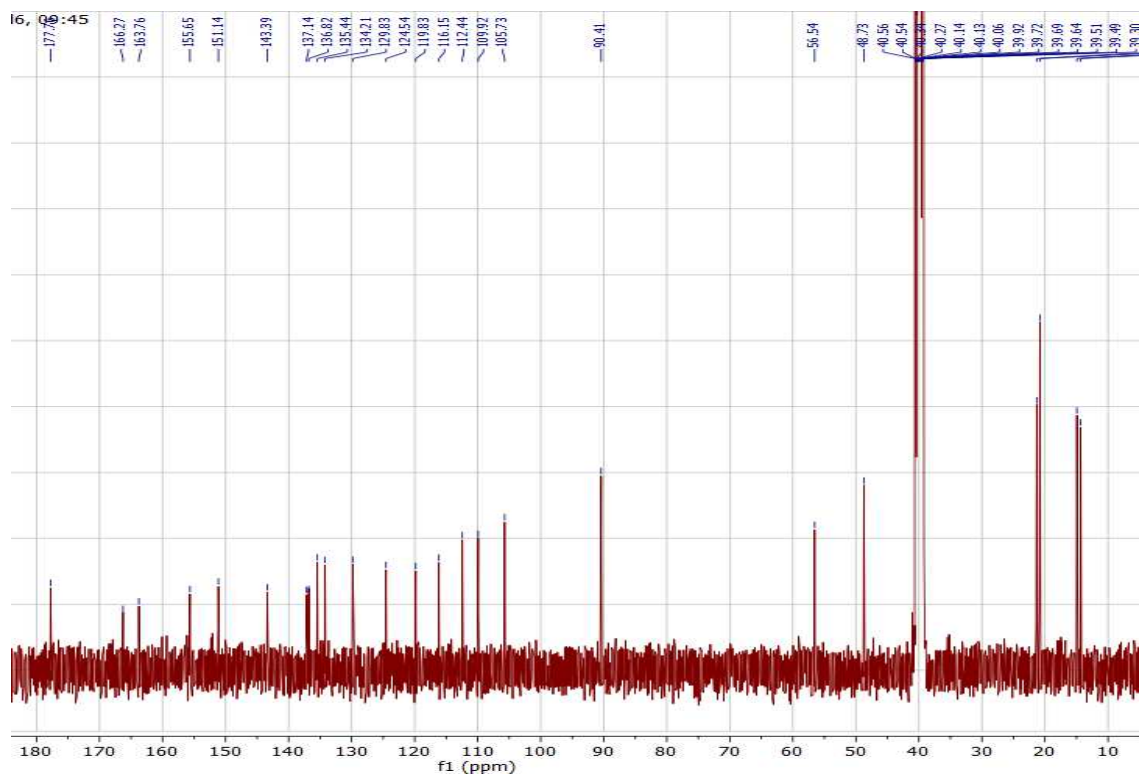

**Figure S12.** <sup>13</sup>C NMR spectrum of **6a** in DMSO-d<sub>6</sub>

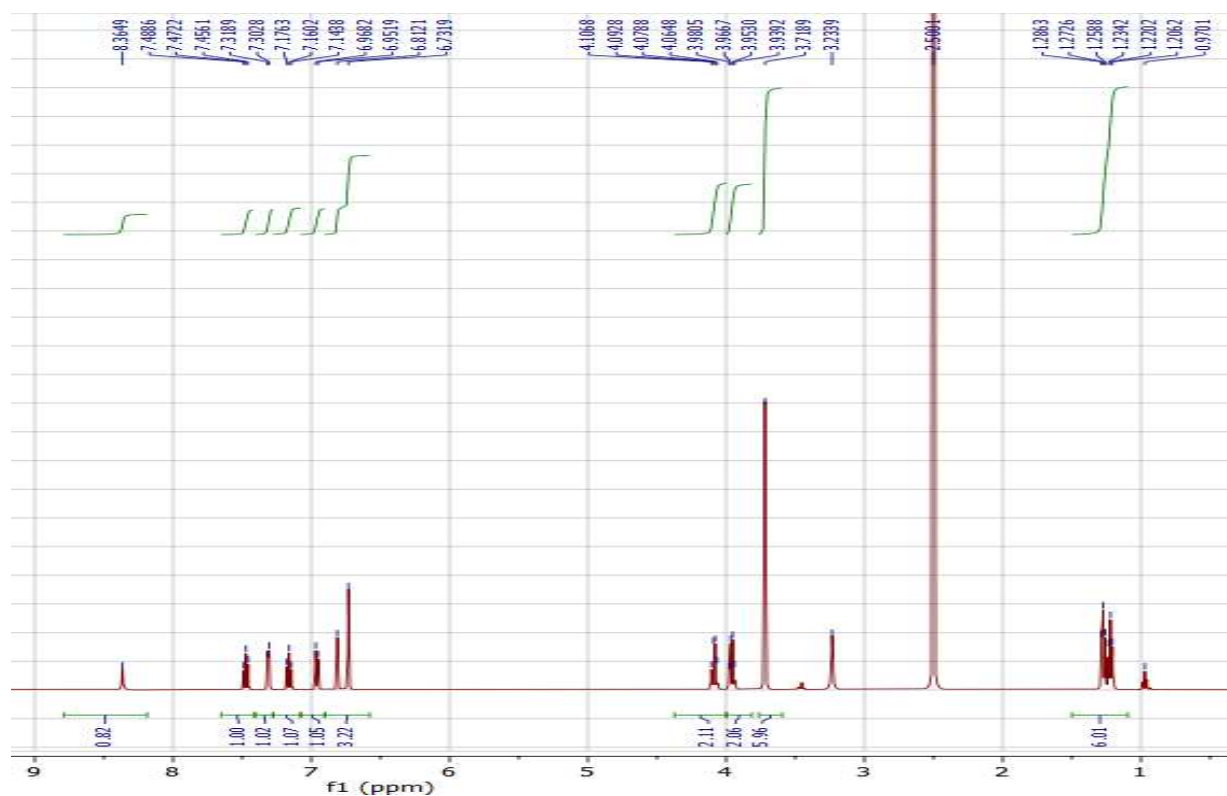

Figure S13. <sup>1</sup>H NMR spectrum of **7a** in DMSO-d<sub>6</sub>

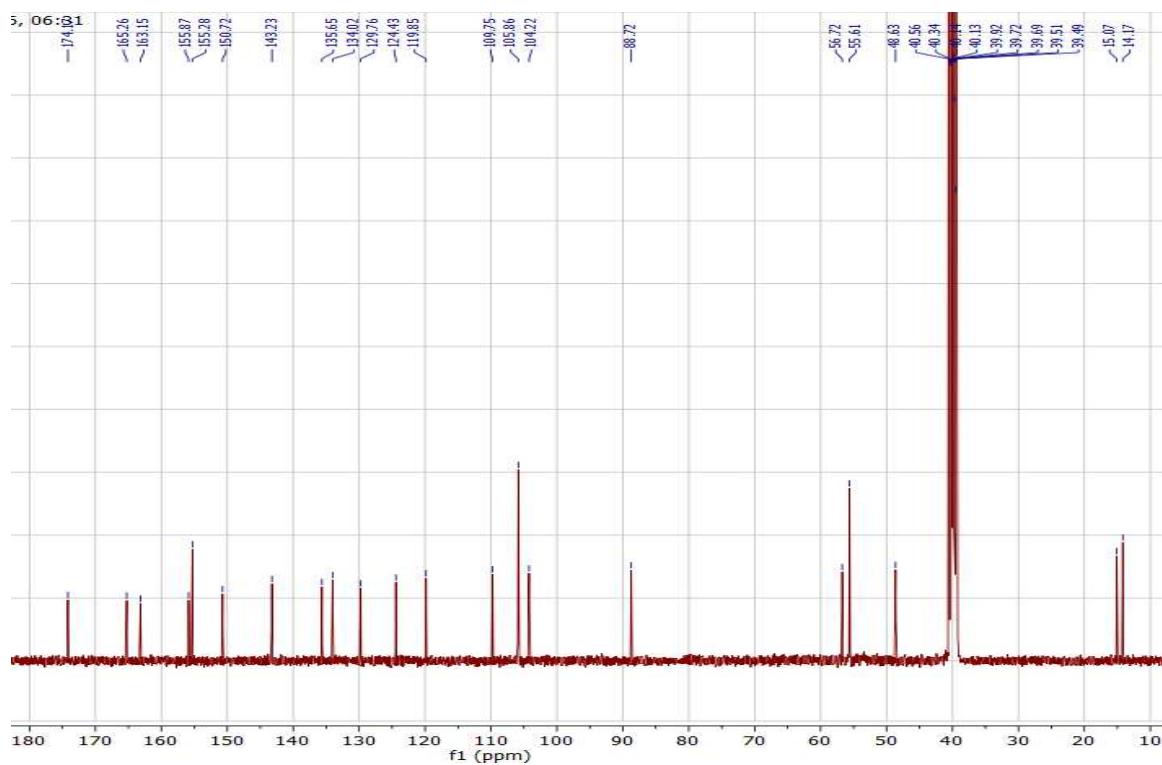

Figure S14. <sup>13</sup>C NMR spectrum of **7a** in DMSO-d<sub>6</sub>



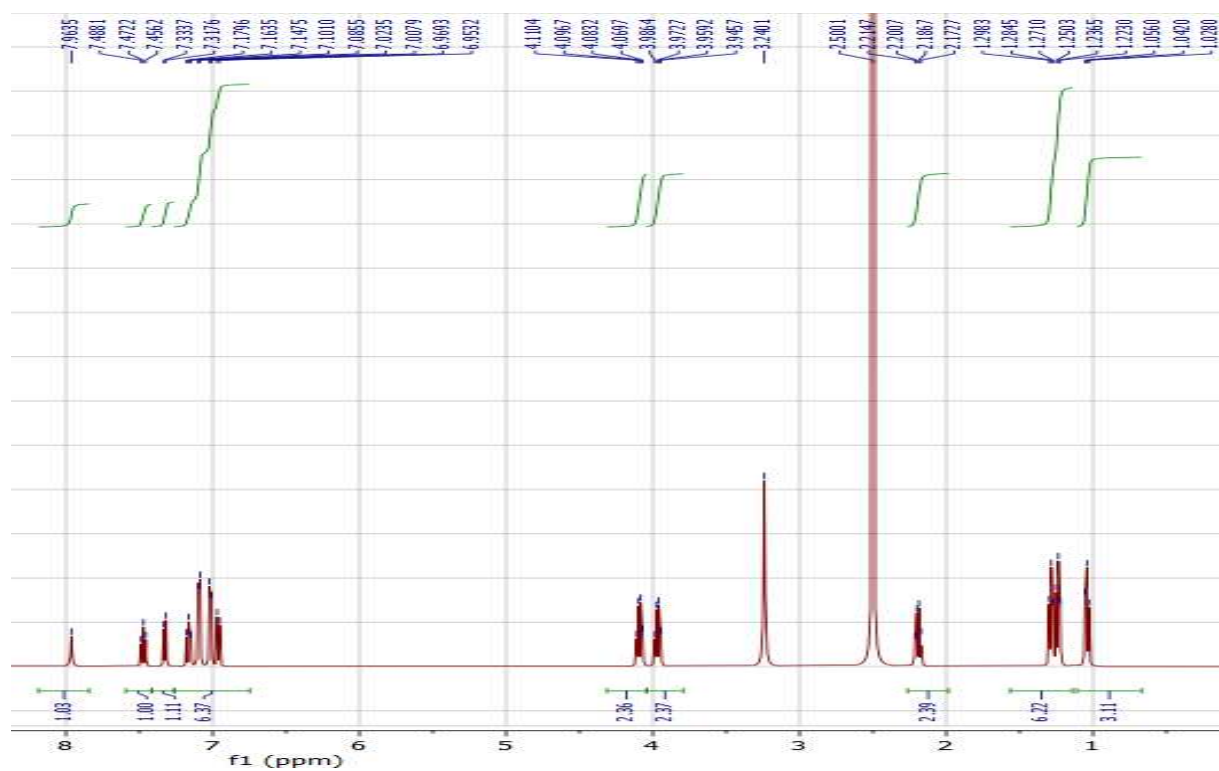

Figure S15. <sup>1</sup>H NMR spectrum of 8a in DMSO-d<sub>6</sub>

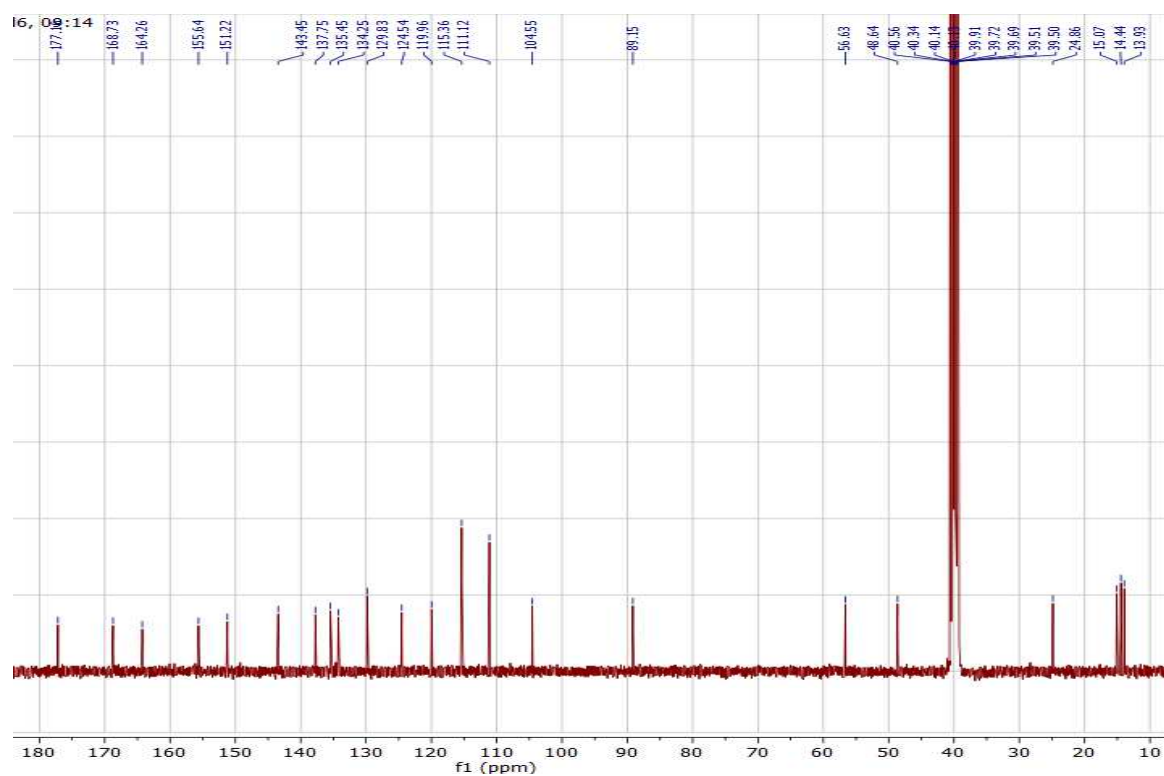

Figure S16. <sup>13</sup>C NMR spectrum of 8a in DMSO-d<sub>6</sub>

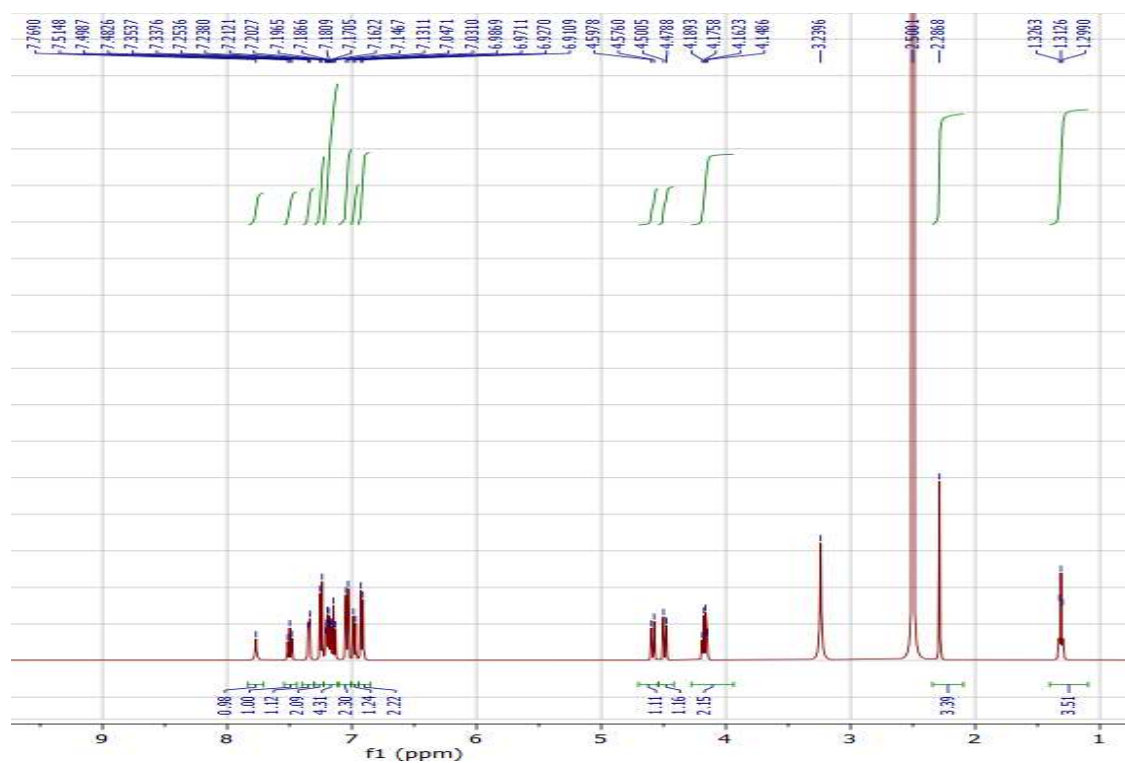

Figure S17.  $^1\text{H}$  NMR spectrum of **9a** in  $\text{DMSO-d}_6$

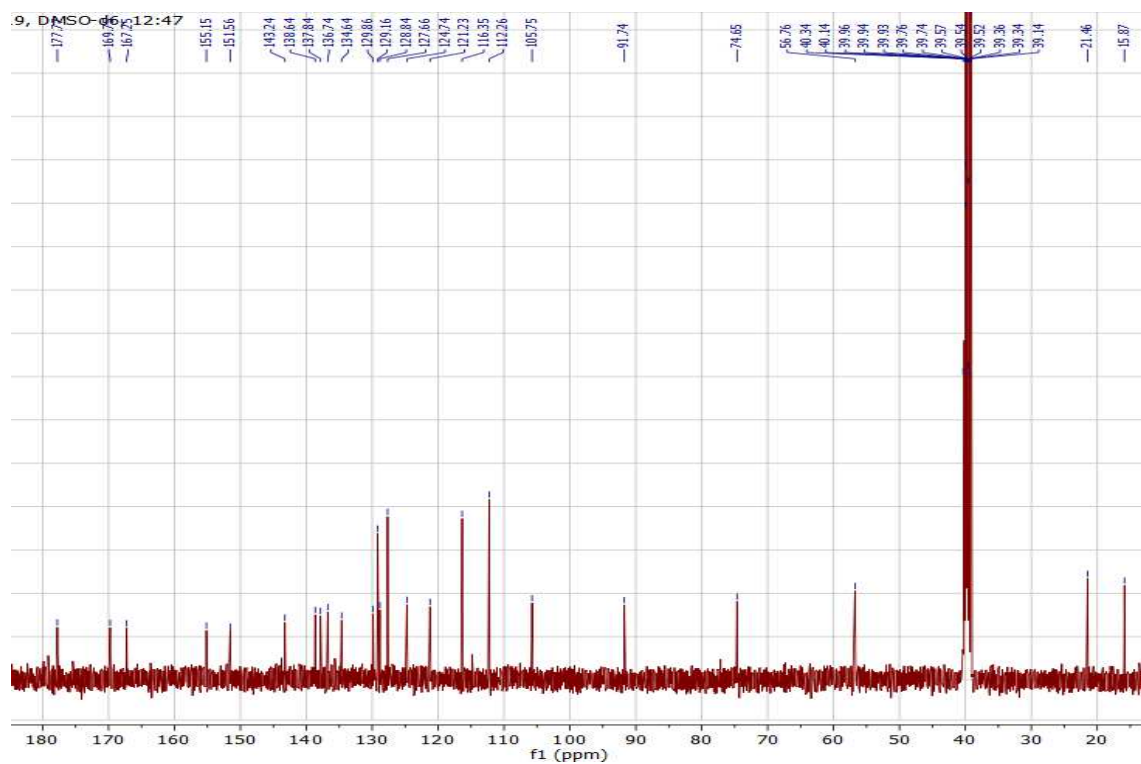

Figure S18.  $^{13}\text{C}$  NMR spectrum of **9a** in  $\text{DMSO-d}_6$



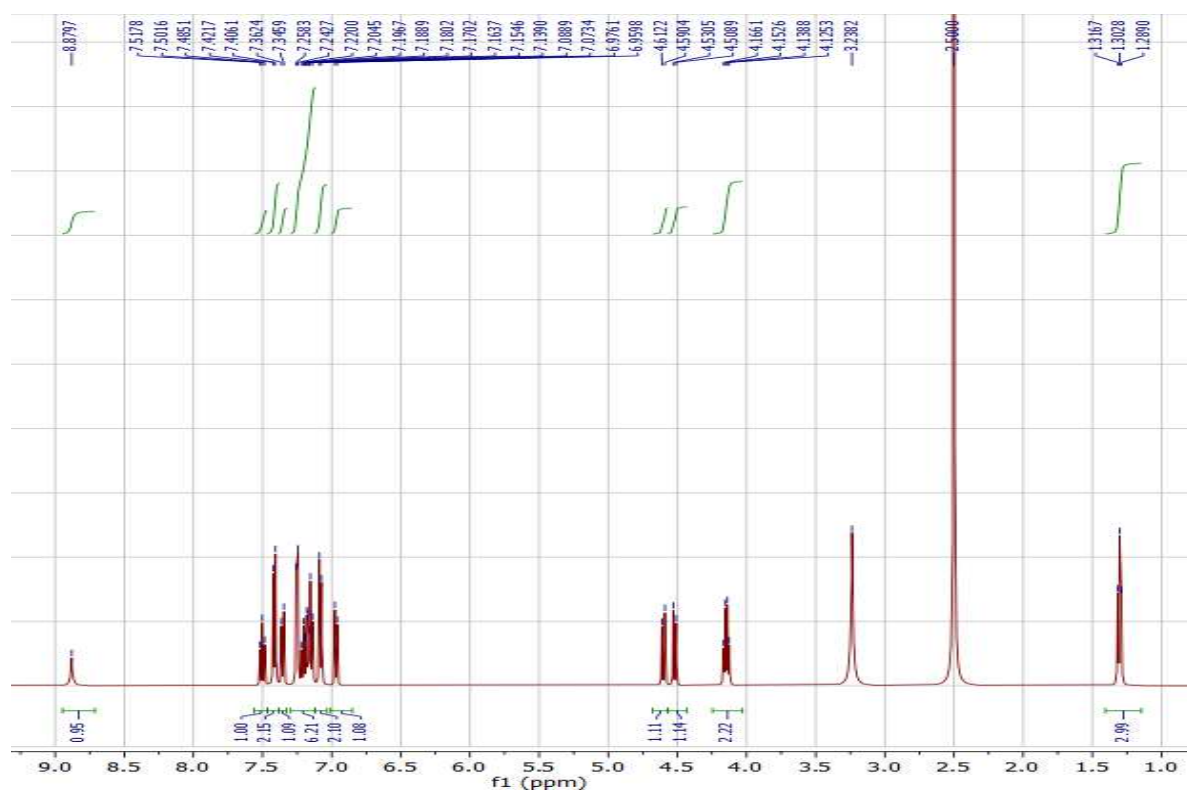

Figure S19. <sup>1</sup>H NMR spectrum of 10a in DMSO-d<sub>6</sub>

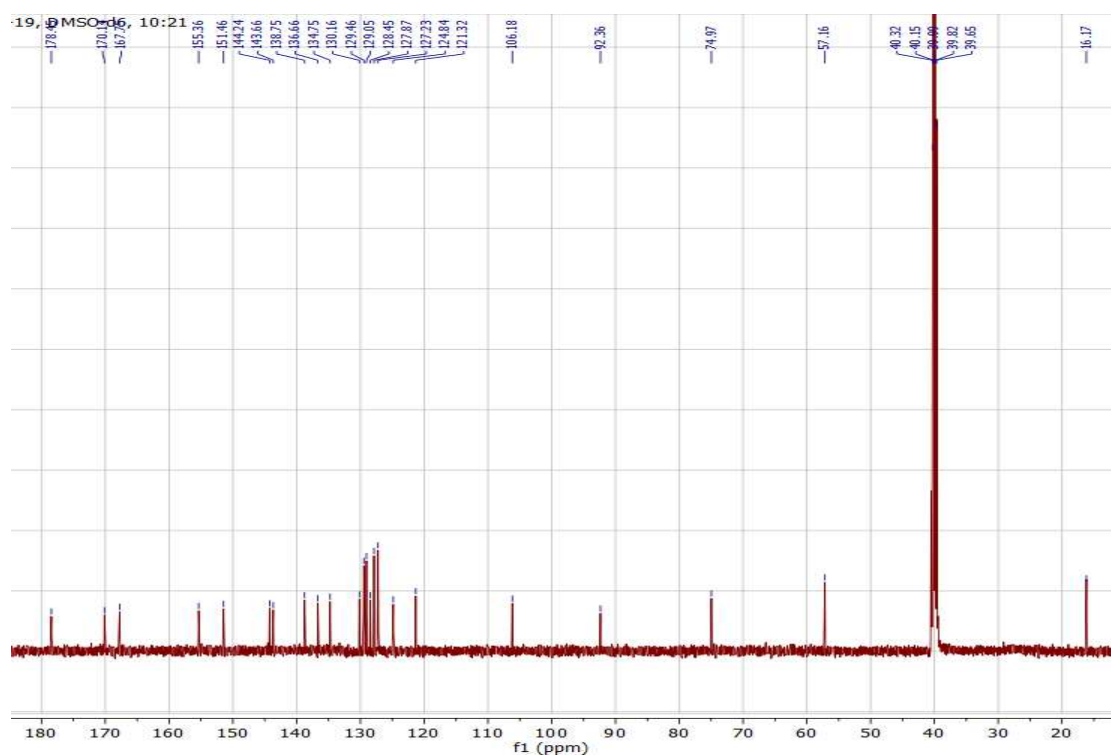

Figure S20. <sup>13</sup>C NMR spectrum of 10a in DMSO-d<sub>6</sub>

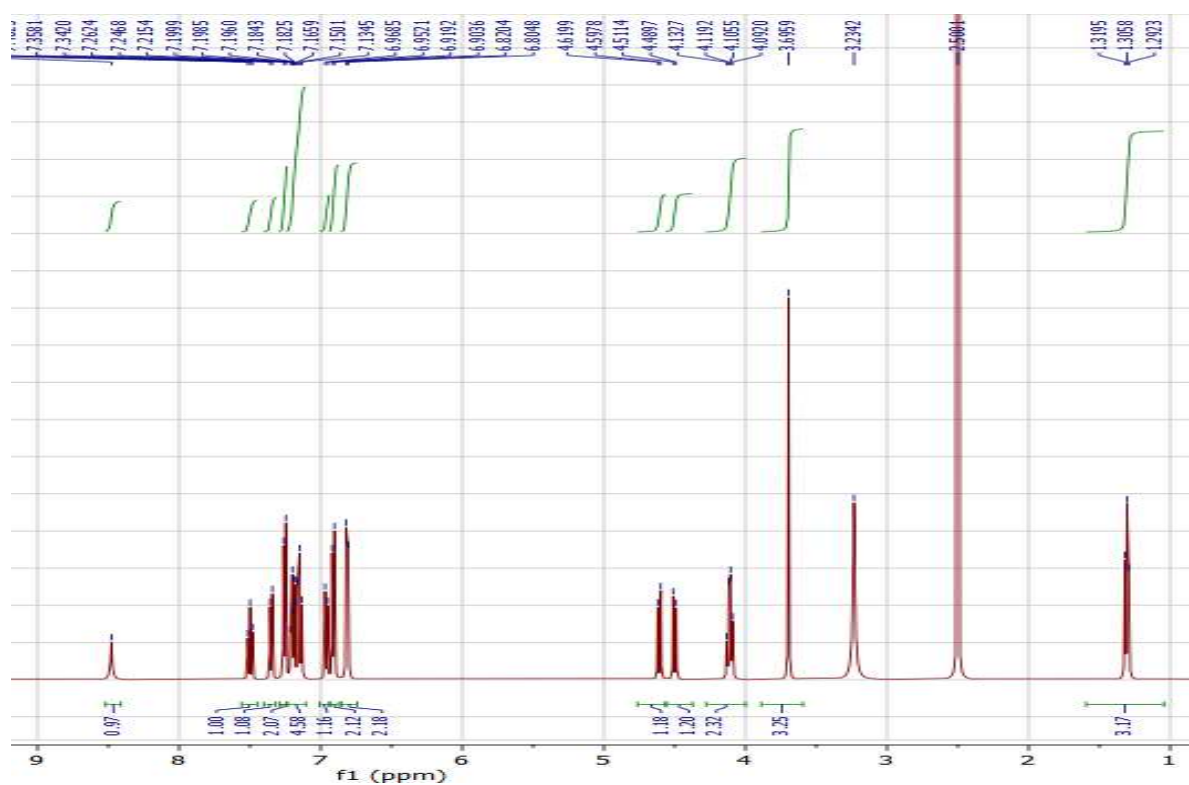

Figure S21. <sup>1</sup>H NMR spectrum of **11a** in DMSO-d<sub>6</sub>

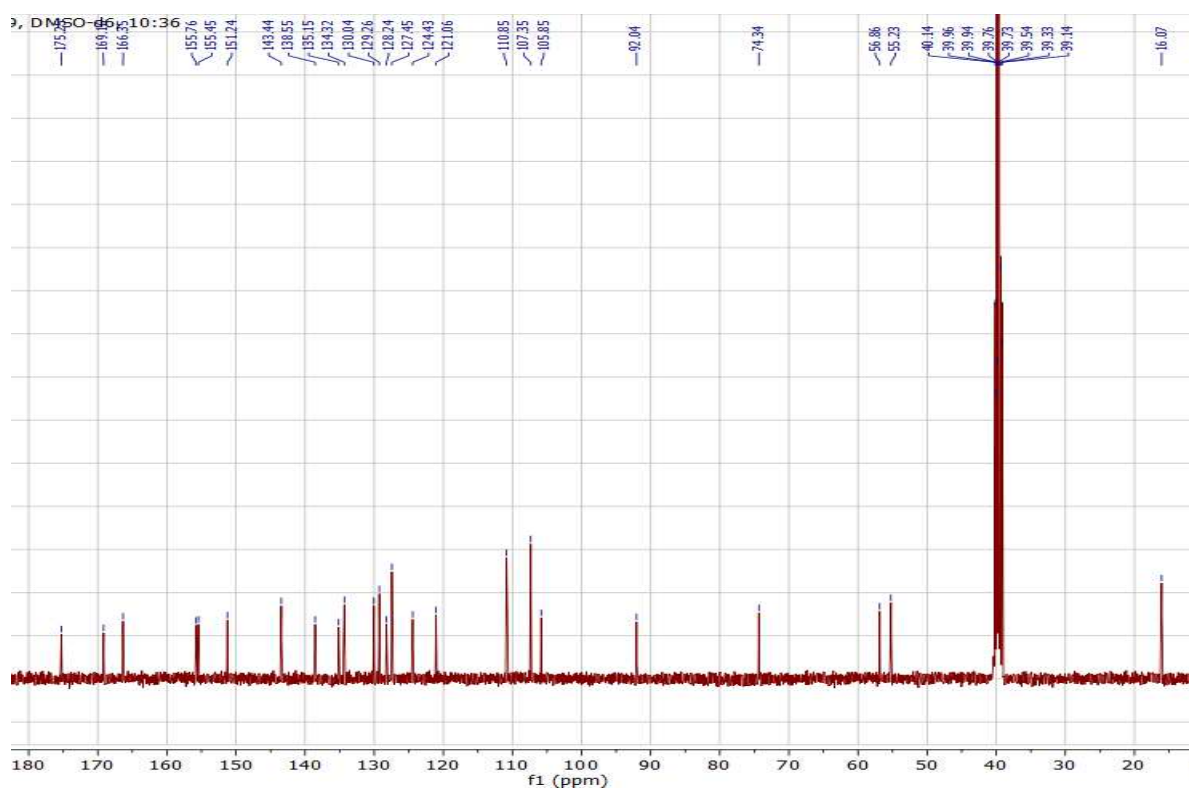

Figure S22. <sup>13</sup>C NMR spectrum of **11a** in DMSO-d<sub>6</sub>

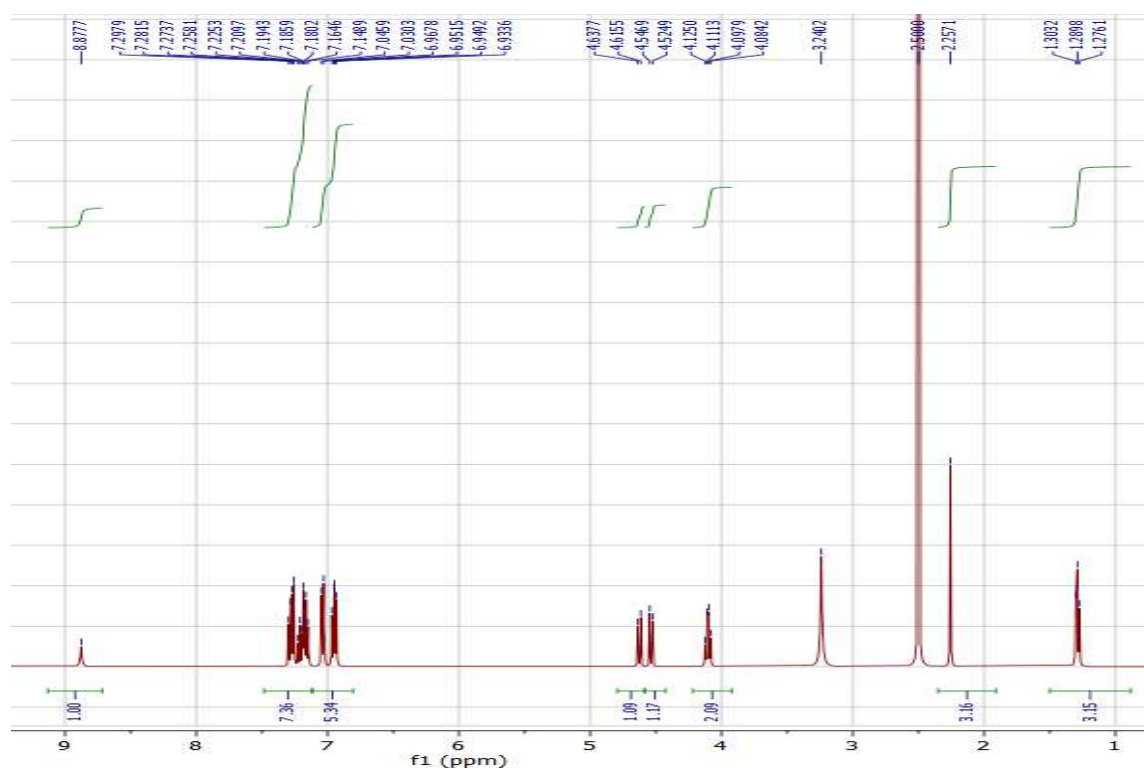

Figure S23. <sup>1</sup>H NMR spectrum of **12a** in DMSO-d<sub>6</sub>

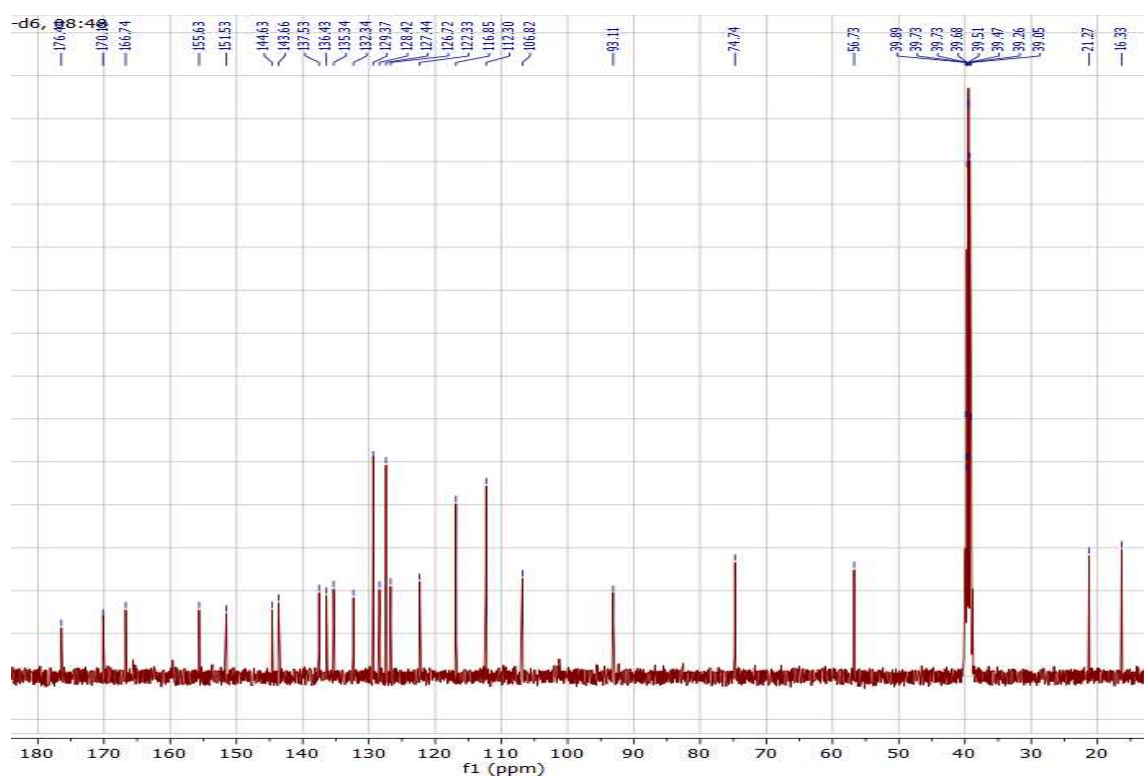

Figure S24. <sup>13</sup>C NMR spectrum of **12a** in DMSO-d<sub>6</sub>

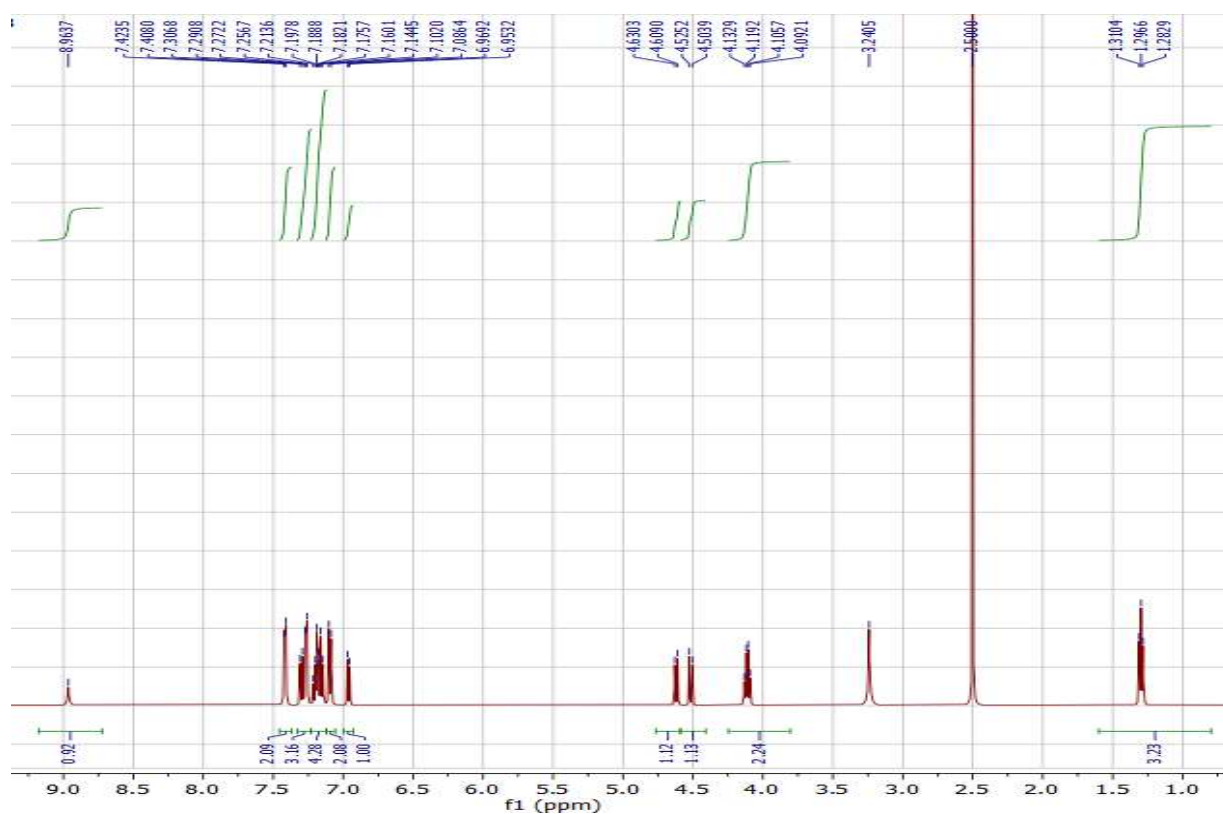

Figure S25. <sup>1</sup>H NMR spectrum of 13a in DMSO-d<sub>6</sub>

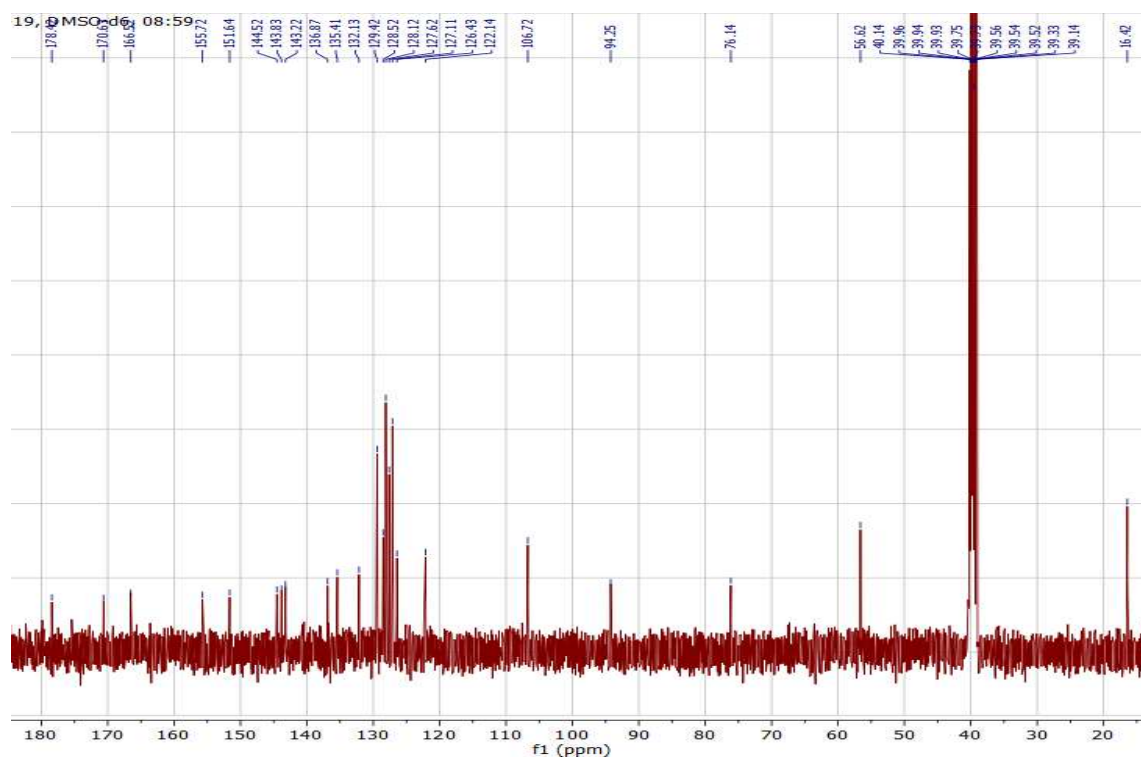

Figure S26. <sup>13</sup>C NMR spectrum of 13a in DMSO-d<sub>6</sub>

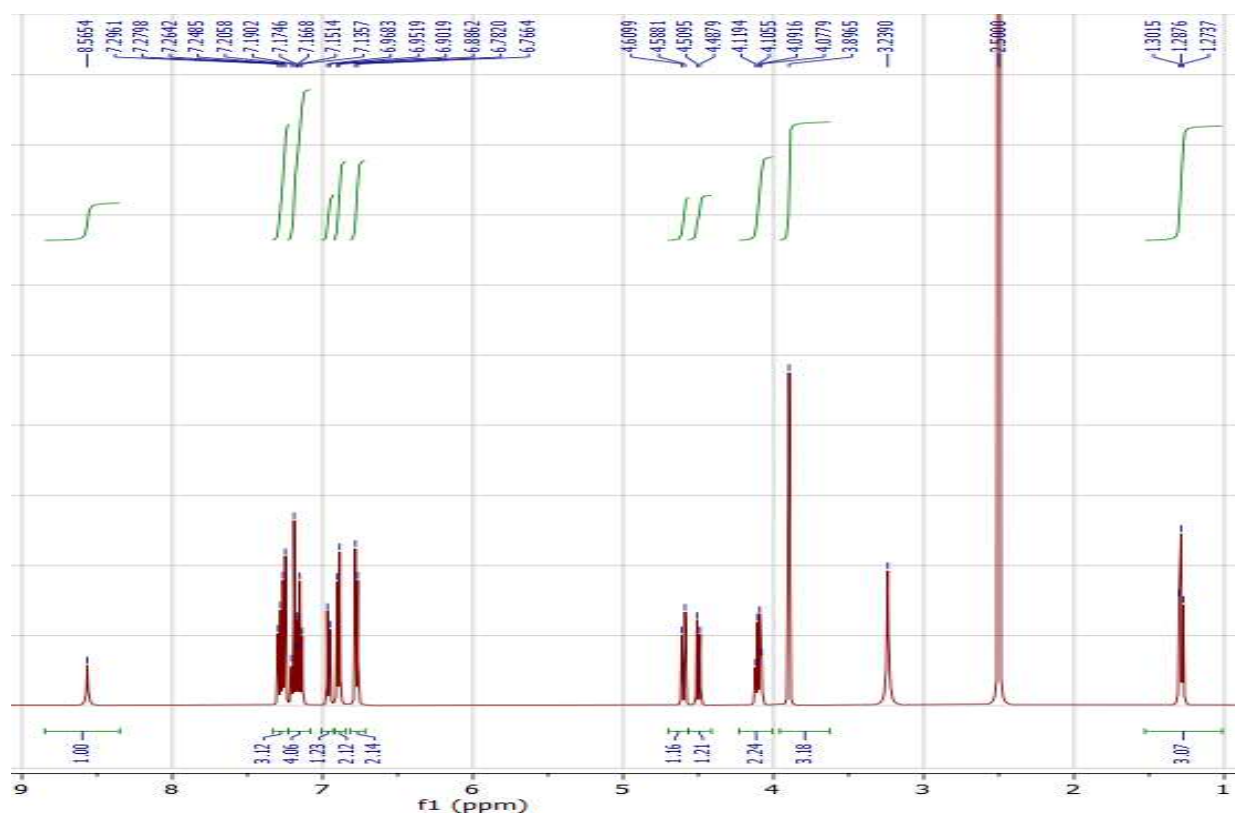

Figure S27.  $^1\text{H}$  NMR spectrum of **14a** in  $\text{DMSO-d}_6$

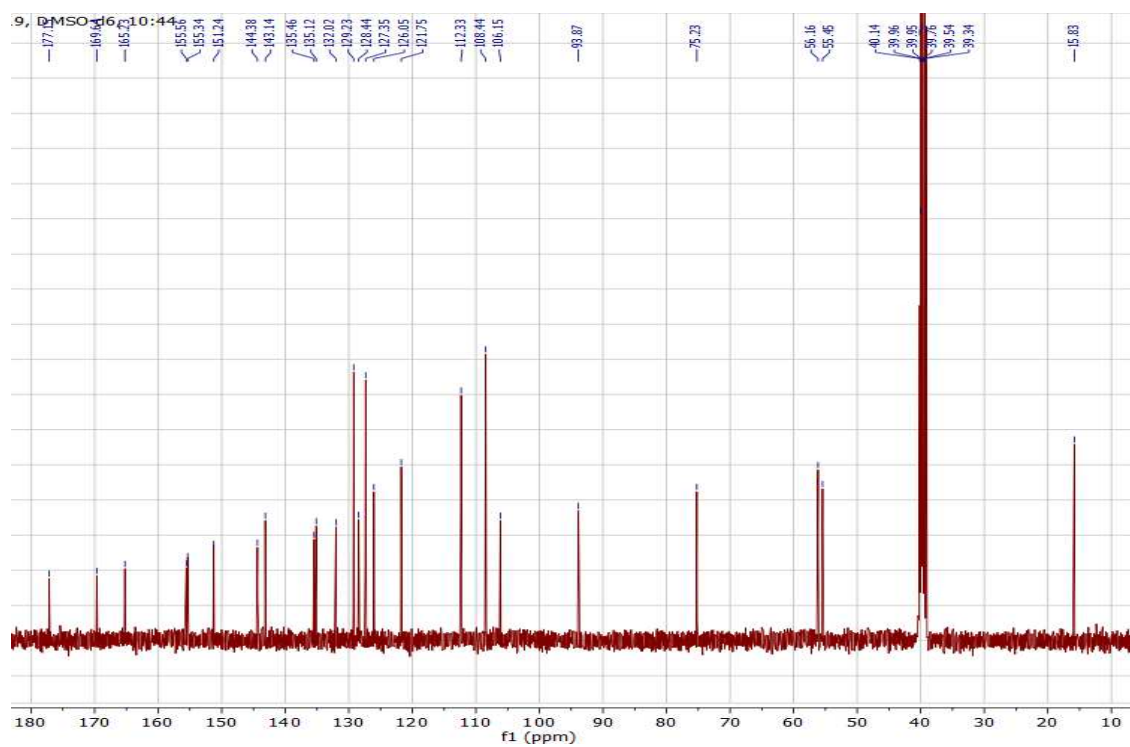

Figure S28.  $^{13}\text{C}$  NMR spectrum of **14a** in  $\text{DMSO-d}_6$

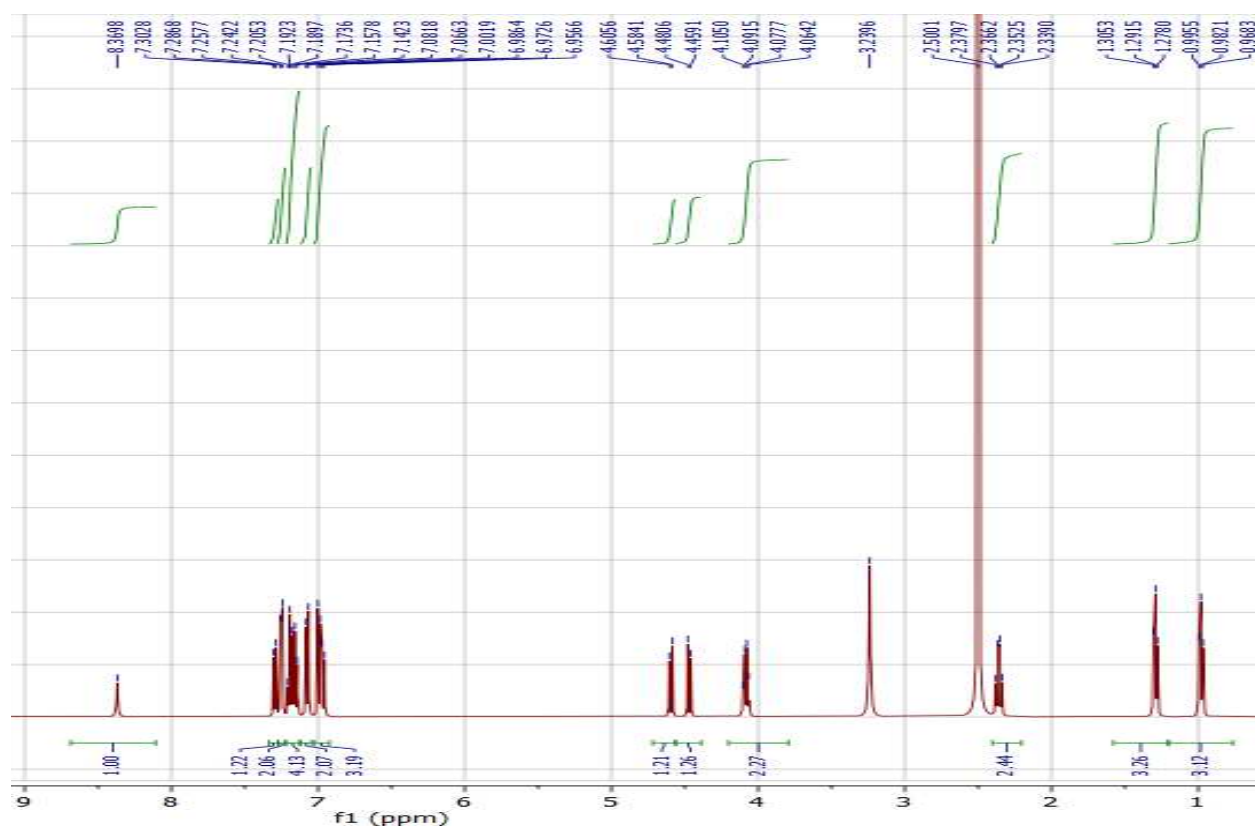

Figure S29. <sup>1</sup>H NMR spectrum of **15a** in DMSO-d<sub>6</sub>

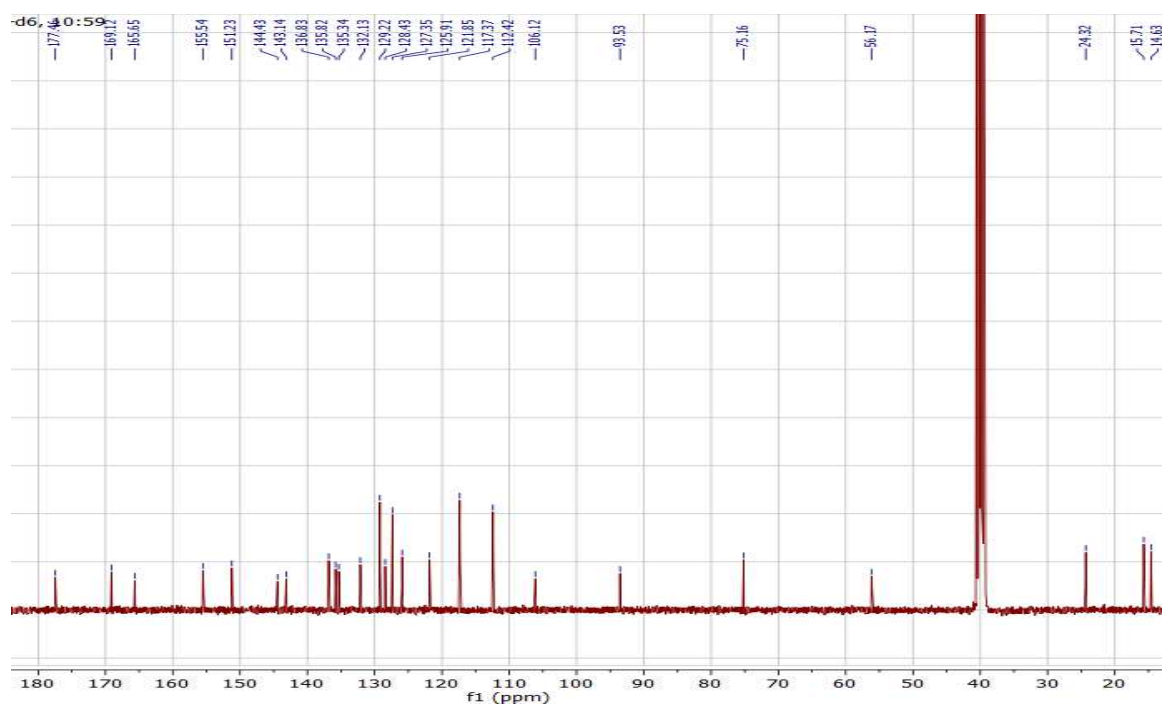

Figure S30. <sup>13</sup>C NMR spectrum of **15a** in DMSO-d<sub>6</sub>

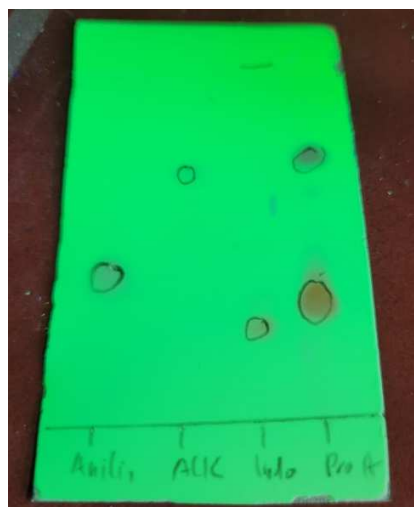

**Figure S31.** Photograph of the TLC control of the reaction of aniline (1. Trace from left to right), diethyl acetylenedicarboxylate (2. Trace), 1-ethylindoline-2,3-dione (3. Trace), using HOAc as catalyst, with two spots of the product mixture (4. Trace). Conditions: 1:1:1 starting materials, 30 mol% HOAc, in 20 mL EtOH, 80°C, US, 3 h. TLC plates: silica, solvent: *c*-hexane/ethyl acetate (2/1).

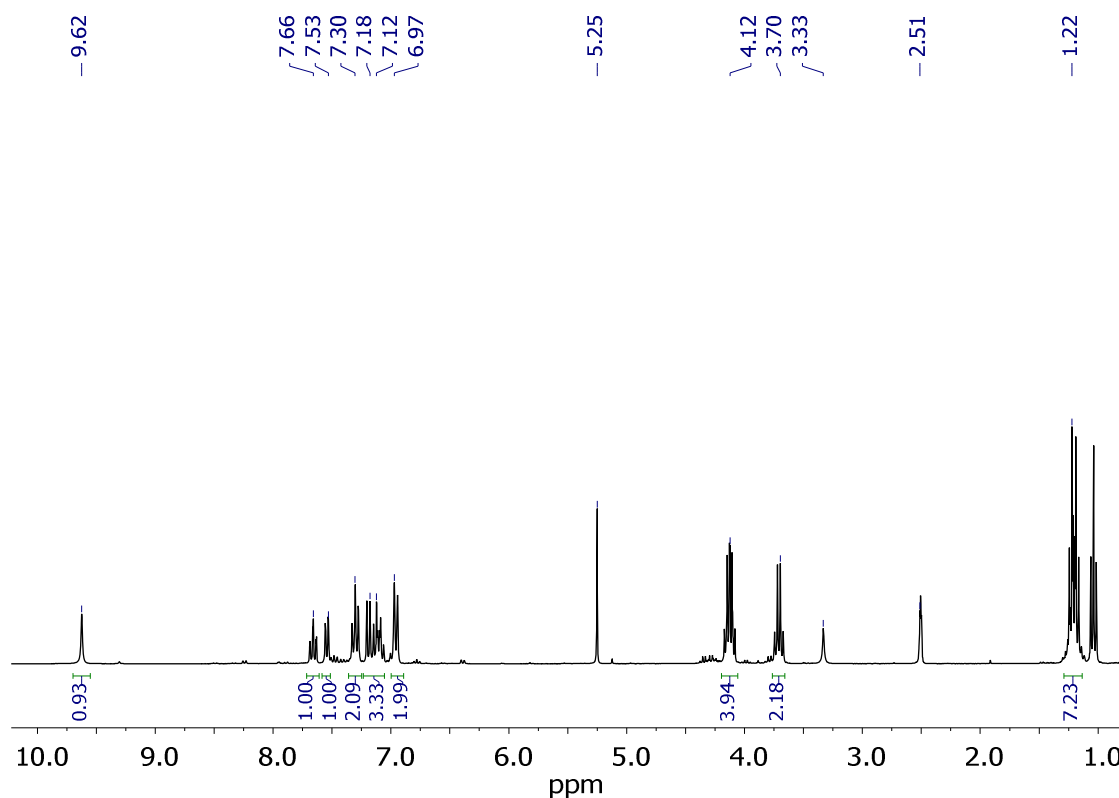

**Figure S32.**  $^1\text{H}$  NMR spectrum of the product mixture from the reaction of aniline, diethyl acetylenedicarboxylate, 1-ethylindoline-2,3-dione, using HOAc as catalyst, measured in  $\text{DMSO-d}_6$ . Conditions: 1:1:1 starting materials, 30 mol% HOAc, in 20 mL EtOH, 80°C, US, 3 h. The signals for the O-ethyl group of the target product **1a** are expected to be merged to a multiplet at 1.26 ppm, the NH proton is expected at 9.00 ppm (compare **Figure S1**).



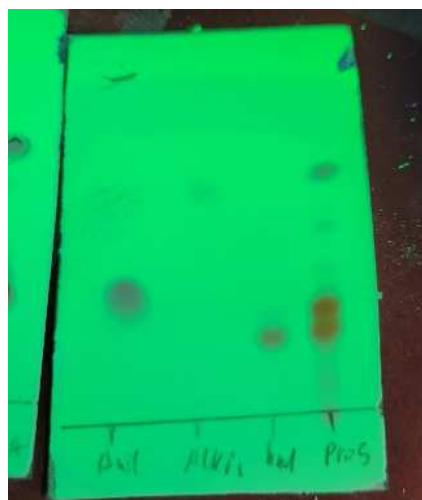

**Figure S33.** Photograph of the TLC control of the reaction of aniline (1. Trace from left to right), diethyl acetylenedicarboxylate (2. Trace), 1-ethylindoline-2,3-dione (3. Trace), using  $\text{H}_2\text{SO}_4$  as catalyst, with two spots of the product mixture (4. Trace). Conditions: 1:1:1 starting materials, 30 mol%  $\text{H}_2\text{SO}_4$ , in 20 mL EtOH,  $80^\circ\text{C}$ , US, 3 h. TLC plates: silica, solvent: *c*-hexane/ethyl acetate (2/1).

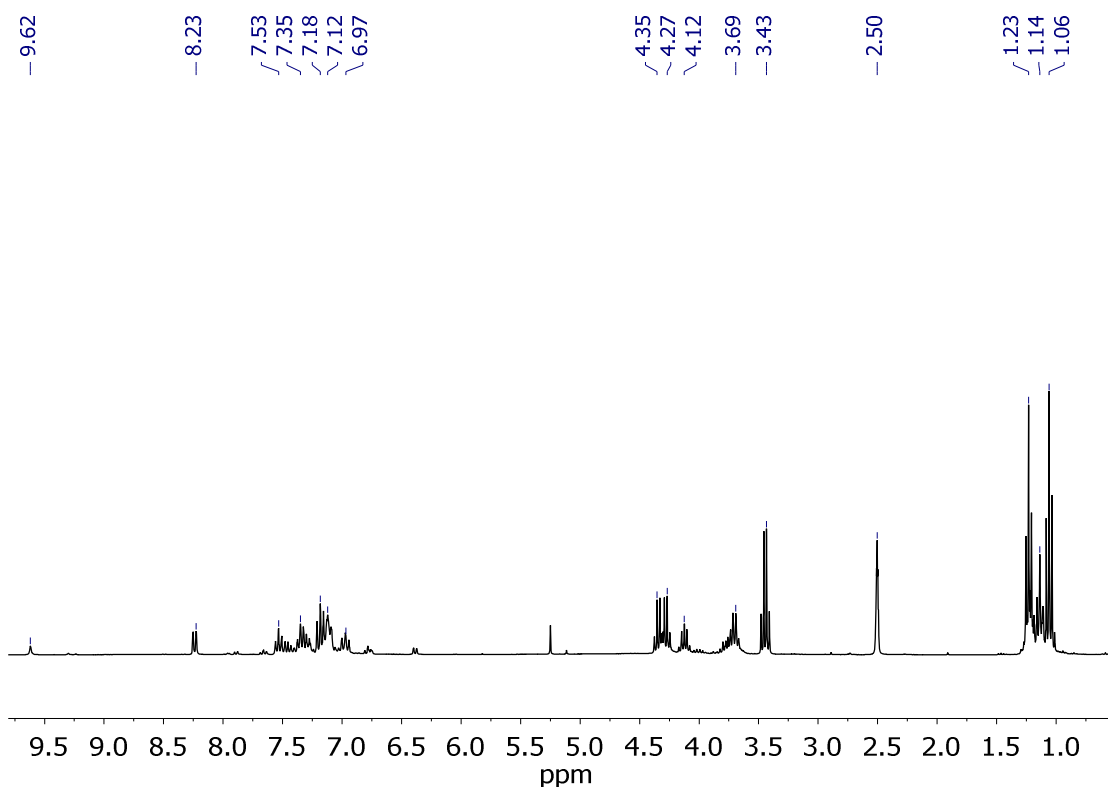

**Figure S34.**  $^1\text{H}$  NMR spectrum of the product mixture from the reaction of aniline, diethyl acetylenedicarboxylate, 1-ethylindoline-2,3-dione, using HOAc as catalyst, measured in  $\text{DMSO-d}_6$ . Conditions: 1:1:1 starting materials, 30 mol% HOAc, in 20 mL EtOH,  $80^\circ\text{C}$ , US, 3 h. The signals for the O-ethyl group of the target product **1a** are expected to be merged to a multiplet at 1.26 ppm, the NH proton is expected at 9.00 ppm (compare **Figure S1**).
